1 **Lipoic acid biosynthesis is essential for *Plasmodium falciparum* transmission and**  
2 **influences redox response and carbon metabolism of parasite asexual blood stages**

3 Marco Biddau<sup>1,2\*</sup>, T.R. Santha Kumar<sup>3</sup>, Philipp Henrich<sup>3</sup>, Larissa M. Laine<sup>2</sup>, Gavin J.  
4 Blackburn<sup>4</sup>, Achuthanunni Chokkathukalam<sup>4</sup>, Tao B Li<sup>5</sup>, Kim Lee Sim<sup>5</sup>, Stephen L  
5 Hoffman<sup>5</sup>, Michael P. Barrett<sup>1,4</sup>, Graham H. Coombs<sup>6</sup>, Geoffrey I. McFadden<sup>7</sup>, David A.  
6 Fidock<sup>3,8,±</sup>, Sylke Müller<sup>2,±</sup>, Lilach Sheiner<sup>1,2\*</sup>.

7 Affiliations:

8 1. Wellcome Centre for Integrative Parasitology, University of Glasgow, Glasgow,  
9 United Kingdom.

10 2. Department of Infection, immunity and inflammation, University of Glasgow,  
11 Glasgow, United Kingdom

12 3. Department of Microbiology and Immunology, Columbia University Irving Medical  
13 Center, New York, NY 10032, USA.

14 4. Glasgow Polyomics, Wolfson Wohl Cancer Research Centre, University of  
15 Glasgow, Glasgow, United Kingdom

16 5. Sanaria Inc., Rockville, Maryland 20850, USA

17 6. Strathclyde Institute of Pharmacy and Biomedical Sciences, University of  
18 Strathclyde, Glasgow, United Kingdom

19 7. School of Botany, University of Melbourne, Parkville, VIC 3010, Australia.

20 8. Division of Infectious Diseases, Department of Medicine, Columbia University  
21 Irving Medical Center, New York, NY 10032, USA.

22

23 \*Corresponding authors: Lilach Sheiner: [lilach.sheiner@glasgow.ac.uk](mailto:lilach.sheiner@glasgow.ac.uk); Marco Biddau:  
24 [mark.biddau@gmail.com](mailto:mark.biddau@gmail.com).

25 ± Equal contributors.

26 Abstract

27 Malaria is still one of the most important global infectious diseases. Emergence of drug  
28 resistance and a shortage of new efficient anti-malarials continue to hamper a malaria  
29 eradication agenda. Malaria parasites are highly sensitive to changes in redox environment.  
30 Understanding the mechanisms regulating parasite redox could contribute to the design of  
31 new drugs. Malaria parasites have a complex network of redox regulatory systems housed in  
32 their cytosol, in their mitochondrion and in their plastid (apicoplast). While the roles of enzymes  
33 of the thioredoxin and glutathione pathways in parasite survival have been explored, the  
34 antioxidant role of  $\alpha$ -lipoic acid (LA) produced in the apicoplast has not been tested. We  
35 analysed the effects of LA depletion on mutant *Plasmodium falciparum* lacking the apicoplast  
36 lipoic acid protein ligase B (*lipB*). Our results showed a change in expression of redox  
37 regulators in the apicoplast and the cytosol. We further detected a change in parasite central  
38 carbon metabolism, with LA depletion influencing glycolysis and tricarboxylic acid cycle  
39 activity. Importantly, abrogation of LipB impacted *P. falciparum* mosquito development,  
40 preventing oocyst maturation and production of infectious sporozoite stages, thus flagging LA  
41 biosynthesis as a potential target for the development of new transmission drugs.

42

## 43 INTRODUCTION

44 Malaria remains a tremendous threat to human health with 200 million infections resulting in  
45 405,000 deaths in 2018 (World Health Organization, 2019), so it is imperative that we identify  
46 new antimalarial targets. One potential target are the parasite redox regulation systems.  
47 *Plasmodium falciparum* is constitutively exposed in all stages of its complex life cycle to  
48 molecules that challenge its redox balance. Finding ways to disrupt this delicate balance hold  
49 promise for drug development. Indeed, *in vitro* experiments in which parasites were exposed  
50 to exogenous H<sub>2</sub>O<sub>2</sub>-generating systems proved lethal for intra-erythrocytic stages (Dockrell  
51 and Playfair, 1984). Likewise, mature gametocytes are sensitive to the oxidative stress  
52 generated by exposure to redox-cyclers *in vitro* (Siciliano et al., 2017). Finally, an animal diet  
53 that generates an environment rich in reactive oxygen species (ROS) in hepatocytes hosting  
54 parasite cells resulted in reduced *Plasmodium* infection *in vivo* (Zuzarte-Luís et al., 2017).  
55 Despite this importance, and the fact that redox regulation is a fundamental aspect of cellular  
56 functions, our understanding of the parasite redox regulatory networks remains limited (Kehr  
57 et al., 2010; Müller, 2015).

58 The apicoplast, a non-photosynthetic plastid acquired via secondary endosymbiosis of a red  
59 algal cell, is an active metabolic hub in apicomplexan parasites including *Plasmodium* spp.,  
60 (Biddau and Sheiner, 2019; Frohnecke et al., 2015; Kimata-Ariga et al., 2018; Mohring et al.,  
61 2014; Sheiner et al., 2013). The apicoplast has key roles in redox balance and hosts  
62 components of the thioredoxin and the glutathione systems, which represent the two best  
63 characterized cellular antioxidant systems. Apicoplast based redox regulators include the  
64 peroxiredoxin antioxidant protein (AOP), the dually-targeted (cytosol and apicoplast) enzymes  
65 glutathione reductase (GR), and the glutathione peroxidase-like thioredoxin peroxidase  
66 (TPx<sub>G</sub>) (Kehr et al., 2010; Laine et al., 2015). Likewise, two glyoxalase system proteins are  
67 apicoplast targeted: glyoxalase-1-like protein (GILP), and glyoxalase 2 (tGlolI) (Kehr et al.,  
68 2010; Urscher et al., 2010). Glyoxalase 2 is proposed to play a role in detoxification of  
69 incomplete triosephosphate-isomerase reaction products, but is apparently dispensable

70 during intra-erythrocytic development (Wezena et al., 2017). Two additional apicoplast  
71 thioredoxin-like proteins (ATrx1 and ATrx2) are found in the peripheral compartments (Sheiner  
72 et al., 2011). ATrx1 and ATrx2 were recently characterised in *T. gondii* and shown to play an  
73 essential role in the control of protein sorting and folding in response to organelle redox status  
74 (Biddau et al., 2018). The *Plasmodium* orthologue of ATrx2 (*PfATrx2*; PF3D7\_0529100) is  
75 likely essential too (Bushell et al., 2017; Zhang et al., 2018). Many other potential redox-active  
76 proteins are predicted to be localised in the apicoplast (Boucher et al., 2018), but their roles  
77 are uncharacterized.

78 An additional molecule proposed to take part in apicoplast redox regulation is  $\alpha$ -lipoic acid  
79 (LA) (Frohnecke et al., 2015; Günther et al., 2007; Laine et al., 2015). Due to its reducing  
80 properties, LA is known as the 'universal antioxidant' (Goraça et al., 2011; Kagan et al., 1992;  
81 Moura et al., 2015; Perham, 2000; Tibullo et al., 2017). The proposed antioxidant role of LA  
82 in the apicoplast is based on a link between redox regulation and apicoplast pyruvate  
83 metabolism via the pyruvate dehydrogenase enzyme complex (PDC). The three enzymes in  
84 the PDC complex are pyruvate dehydrogenase (E1), dihydrolipoyl transacetylase (E2) and  
85 apicoplast dihydrolipoyl dehydrogenase (aE3). Through a series of reactions, PDC transfers  
86 an acetyl group from pyruvate to coenzyme A (CoA) to generate acetyl-CoA for the fatty acid  
87 biosynthesis pathway (Foth et al., 2005; Mooney et al., 2002) (Fig. 1). This activity depends  
88 on LA bound to the E2 lipoyl domain, which is reduced to dihydrolipoic acid (DHLA) during the  
89 process. The final reaction of *Plasmodium* PDC is catalysed by aE3, which re-oxidises DHLA  
90 back to LA to allow another cycle of PDC activity (Fig. 1). The activity of aE3 is coupled to the  
91 reduction of  $\text{NAD}^+$  to  $\text{NADH}+\text{H}^+$ , which in turn takes part in apicoplast redox regulation (Laine,  
92 2014; McMillan et al., 2005). The DHLA/LA redox couple has a redox potential of -0.32 V,  
93 which is lower than the glutathione/glutathione disulphide (GSH/GSSG) couple potential of -  
94 0.24 V, thus making glutathione a potential substrate for DHLA (Packer et al., 1995).

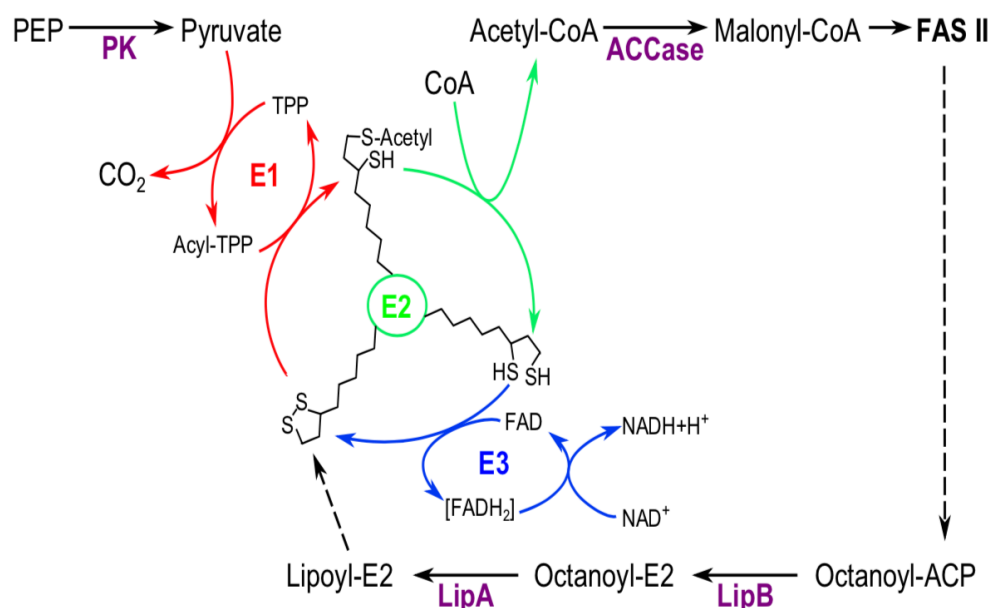

95

96 **Figure 1. Schematic representation of PDC and LA biosynthesis components and**  
 97 **function in *P. falciparum* apicoplast.** Each of the PDC enzyme reactions is shown in  
 98 different colour (E1, red; E2, green; E3, blue). The three states of E2-conjugated LA are  
 99 depicted onto the schematic E2. Abbreviations: ACCase: Acetyl-CoA carboxylase; CoA:  
 100 Coenzyme A; FAD: Flavin adenine dinucleotide; FAS II: Fatty acid biosynthesis type II; LipA:  
 101 lipoyl synthase; LipB: Octanoyl-ACP:protein *N*-octanoyltransferase; NAD: Nicotinamide  
 102 adenine dinucleotide; PK: Pyruvate kinase; TPP: Thiamine pyrophosphate.  
 103

104 The apicoplast retains its exclusive LA biosynthesis pathway, catalysed by the enzymes  
 105 octanoyl-ACP:protein *N*-octanoyltransferase (LipB) and lipoyl synthase (LipA)(Fig. 1), which  
 106 operates independently from the mitochondrial LA salvage (Crawford et al., 2006; Günther et  
 107 al., 2009). To test the putative role of LA in redox regulation, and its link to parasite metabolism,  
 108 we examined the changes in the expression of redox regulation enzymes and the metabolic  
 109 changes occurring in a *P. falciparum* mutant (named 3D7<sup>Δ*Pf*lipB</sup>) where the *lipB* gene is  
 110 disrupted (Günther et al., 2007). As a comparison, we also analysed an aE3 deletion mutant  
 111 that has only a mild effect on redox balance in the parasite (Laine et al., 2015), potentially  
 112 because aE3 function might be compensated by alternative apicoplast enzymatic systems  
 113 coupled to NAD(P)<sup>+</sup> reduction such as the NADP<sup>+</sup>-specific glutamate dehydrogenase (Zocher  
 114 et al., 2012). Our results support a link between LA availability and redox regulation.  
 115 Additionally, LipB depletion led to changes in central carbon metabolism corroborating a link  
 116 between apicoplast redox regulation and cytosolic and mitochondrial metabolic pathways.

117 Importantly, LipB depletion hampers the ability of the parasites to develop in the mosquito,  
118 which is in line with the crucial functions of redox regulation and fatty acid biosynthesis in the  
119 insect stage of the parasite life cycle (Cobbold et al., 2013; Pastrana-Mena et al., 2010;  
120 Siciliano et al., 2017; van Schaijk et al., 2014).

121

## 122 **RESULTS**

### 123 **Deletion of *lipB* modulates apicoplast and cytosol antioxidant levels**

124 Pronounced LA deficiency was earlier detected in the trophozoite stage in LipB KO line  
125 3D7 <sup>$\Delta$ PflipB</sup> parasites (Günther et al., 2007). To investigate whether this deficiency affected the  
126 apicoplast antioxidant composition, we monitored the relative transcription levels of genes  
127 encoding apicoplast antioxidants at 26-, 30- and 34-hours post-invasion (hpi) by qPCR for  
128 both 3D7 <sup>$\Delta$ PflipB</sup> and the parental (3D7<sup>WT</sup>) parasites. We tested the apicoplast redox-active  
129 proteins TPX<sub>GI</sub>, ATrx2 and AOP (Fig. 2), which take part in the thioredoxin redox system, and  
130 the apicoplast glyoxalase system proteins GILP and tGlo (Fig. S1). Among these, TPX<sub>GI</sub> had  
131 the most dramatic change in expression levels. Relative transcription levels of TPX<sub>GI</sub> displayed  
132 three to four-fold increases at 30 hpi and 34 hpi when compared to 3D7<sup>WT</sup>. Similarly, ATrx2  
133 relative expression showed a four-fold increase compared to the 3D7<sup>WT</sup> parasites at 26 hpi  
134 followed by a two-fold decrease at 34 hpi, when AOP also showed 2-fold decrease (Fig. 2). In  
135 contrast, the apicoplast glyoxalase system enzymes presented no significant differences in  
136 relative expression (Fig. S1).

137 In light of this apicoplast antioxidant response, we wanted to test whether the cytosolic  
138 antioxidant composition was also affected. Therefore, we used quantitative fluorescent  
139 western blotting to monitor the relative levels of glutathione S-transferase (GST;  
140 PF3D7\_1419300), 1-Cys peroxiredoxin (1CysPx; PF3D7\_0802200) and 2-Cys peroxiredoxin  
141 (2-CysPx; PF3D7\_1438900). These proteins were measured in 3D7 <sup>$\Delta$ PflipB</sup> and 3D7<sup>WT</sup> late  
142 trophozoites at 34 hpi. We observed a significant two-fold increase in protein levels for GST  
143 and 1-CysPx in 3D7 <sup>$\Delta$ PflipB</sup> mutants (Fig. 2B). Conversely, 2-CysPx levels appeared to remain  
144 unchanged between the two lines (Fig. 2B).

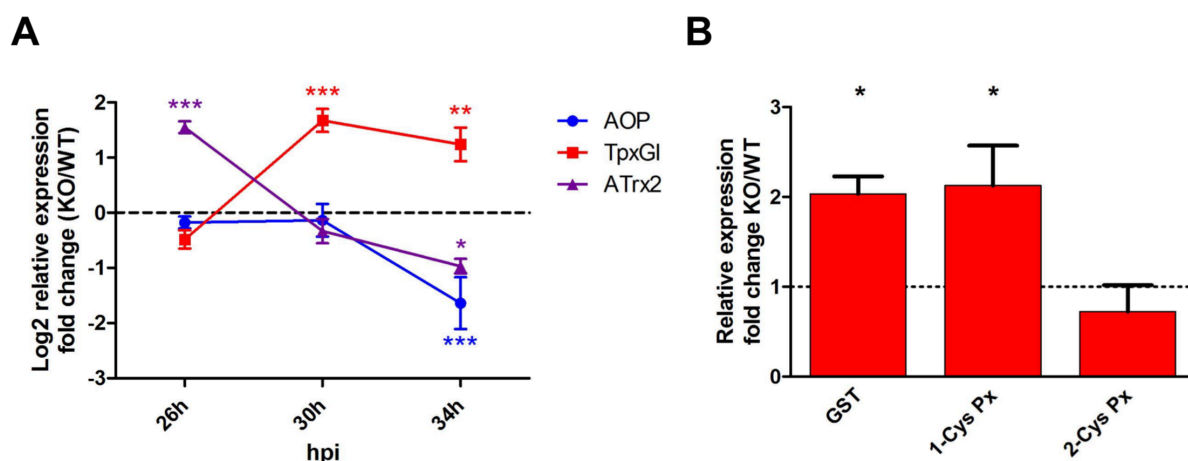

145

146 **Figure 2. Analysis of apicoplast antioxidant relative expression levels and cytosolic**  
 147 **antioxidant relative protein levels.** (A) Relative expression levels for apicoplast antioxidant  
 148 protein (AOP), glutathione peroxidase-like thioredoxin peroxidase (TP<sub>XGI</sub>), and apicoplast  
 149 thioredoxin-like protein 2 (ATrx2), in the LipB mutant compared to wild type. Parasites were  
 150 highly synchronised following the sorbitol and MACS protocol (see Materials and Methods)  
 151 and harvested at 26, 30 and 34 hours post-invasion (hpi). Differences are expressed as Log<sub>2</sub>  
 152 of the 3D7<sup>ΔPflipB</sup>/3D7<sup>WT</sup> ratio of the mean signals from three experiments performed in biological  
 153 triplicates (n=3). Error bars show SD. Variances were analysed using the 2-way ANOVA test  
 154 coupled with the Bonferroni test using GraphPad Prism 5. Asterisks and graph lines are colour  
 155 coded as shown in the legend; \*: P<0.05; \*\*: P<0.01; \*\*\*: P<0.001. (B) Relative protein levels  
 156 for the cytosolic antioxidant proteins glutathione S-transferase (GST), 1-Cys peroxiredoxin (1-  
 157 CysPx) and 2-Cys peroxiredoxin (2-CysPx). Three independent experiments were performed  
 158 in biological triplicates and the means (n=3) of actin-normalised fluorescent signals for each  
 159 protein were calculated using quantitative fluorescent western blotting. The bars represent the  
 160 3D7<sup>ΔPflipB</sup>/3D7<sup>WT</sup> average ratio ± SD. The variance was analysed with the Student t-test using  
 161 GraphPad Prism 5; \*: P<0.05.  
 162

### 163 Deletion of *lipB* affects parasite carbon metabolism

164 In eukaryotic cells, compartmental redox state and the availability of redox conducting and  
 165 regulating molecules in different cellular compartments are intertwined with the activity of  
 166 metabolic pathways. The redox conditions in a cellular compartment affect the function of its  
 167 metabolic enzymes, while in return, the metabolic reactions in a compartment generate  
 168 metabolites that impact its redox state. Thus, we proceeded to examine whether the observed  
 169 redox changes in 3D7<sup>ΔPflipB</sup> mutants coincide with changes in central carbon metabolism. We  
 170 chose to make this analysis alongside a *P. falciparum* apicoplast dihydrolipoamide  
 171 dehydrogenase (aE3) knock-out mutant (3D7<sup>ΔPfae3</sup>) (Laine et al., 2015). Unlike 3D7<sup>ΔPflipB</sup>, the  
 172 deletion of a PDC component in 3D7<sup>ΔPfae3</sup> does not result in disruption of LA biosynthesis nor

173 of PDC activity and its effect on the expression of redox regulators is only mild (Laine et al.,  
174 2015), which makes  $3D7^{\Delta Pfae3}$  an ideal negative control.  
175 The levels of D-glucose and L-lactate in spent medium were monitored using commercial  
176 enzymatic assays in two independent experiments. As glycolytic activity in *P. falciparum*  
177 typically peaks during intra-erythrocytic trophozoite development (Shivapurkar et al., 2018),  
178 we collected samples at 30, 34, 38 and 42 hpi to cover this developmental stage. Results  
179 showed that spent medium samples from  $3D7^{\Delta PflipB}$  contained significantly less D-glucose and  
180 more L-lactate than  $3D7^{WT}$  at 42 hpi (Fig. 3). Conversely,  $3D7^{\Delta Pfae3}$  mutants did not present  
181 this trend and the concentrations for these metabolites in spent medium were comparable to  
182 the WT controls (Fig. S2).

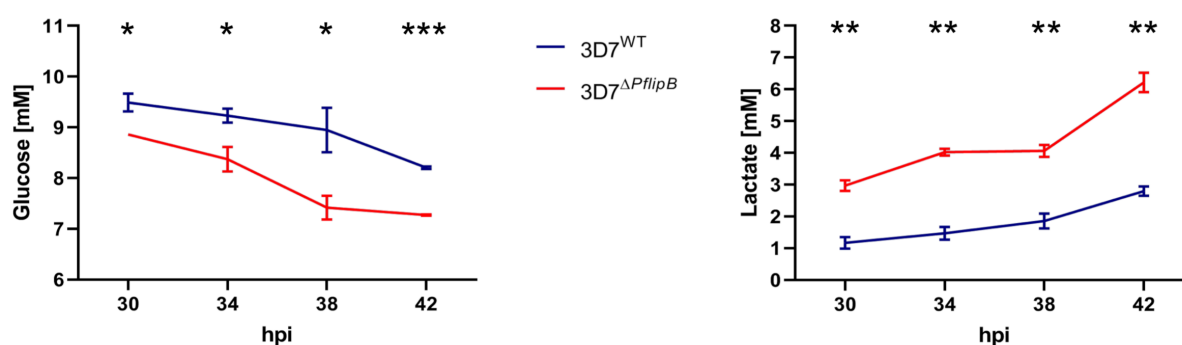

183

184 **Figure 3. Analysis of D-glucose (left) and L-lactate (right) in spent medium samples**  
185 **from  $3D7^{\Delta PflipB}$  mutants and  $3D7^{WT}$  parasites cultures.** Spent medium samples were  
186 collected at 30, 34, 38 and 42 hpi and analysed using a commercial enzymatic assay for D-  
187 glucose and L-lactate. Triplicate cultures at 2% parasitemia were used for each parasite line  
188 for this experiment. The mean signals from 2 independent experiments (n=2) are reported with  
189 error bars representing SD. The variance between the lines at each time point was analysed  
190 with the Student t-test using GraphPad Prism 5; \*: P<0.05; \*\*: P<0.01; \*\*\*: P<0.001.  
191

192 We further hypothesised that the up-regulation of glycolysis and the change to antioxidant  
193 expression described above might affect downstream metabolism and, especially the  
194 tricarboxylic acid (TCA) cycle. Therefore, we proceeded to set up two steady-state targeted  
195 metabolomics experiments in biological triplicates, using the isotope-labelled nutrient  $^{13}C$ -U-  
196 D-glucose.  $3D7^{\Delta PflipB}$  and  $3D7^{WT}$  parasites were synchronised and metabolically labelled for  
197 28 hours. Parasites at the late trophozoite stage were then rapidly chilled, and the extracted  
198 metabolites analysed by liquid chromatography-mass spectrometry (LC-MS) to follow [ $^{13}C$ ]



199 labelling. The analysis of the labelled fraction for these metabolites showed an immediate  
200 conversion of glucose into glycolytic intermediates (Fig. S3), in line with previous analyses  
201 (Storm et al., 2014). In agreement with the observation from the spent medium, 3D7 <sup>$\Delta$ PflipB</sup>  
202 mutants displayed a two-fold increase in the relative levels of the glycolytic metabolite pyruvate  
203 and of glycerol-3-phosphate, which derive from a glycolytic intermediate (Fig. 4A, B). A similar  
204 trend was also displayed by the metabolites 2-oxoglutarate and succinate associated with the  
205 TCA cycle, as well as the amino acid aspartate, whereas alanine displayed the reverse  
206 tendency (Fig. 4A, B). Conversely, the analysis of 3D7 <sup>$\Delta$ Pfae3</sup> mutants showed no significant  
207 differences in the relative abundances for these metabolites (Fig. 4B).

208 Only a small fraction of [<sup>13</sup>C] labelled triose phosphates was fed into the TCA cycle  
209 intermediates in all three parasite lines (Fig. S3), as has been well established in the literature  
210 (Ke et al., 2015; MacRae et al., 2013; Storm et al., 2014). Interestingly, whereas the 3D7<sup>WT</sup>  
211 and 3D7 <sup>$\Delta$ Pfae3</sup> controls had M+4, M+5 and M+6 citrate labelling, indicative of a complete TCA  
212 cycle activity (Fig. 4C), this was not the case for 3D7 <sup>$\Delta$ PflipB</sup>. Rather, in 3D7 <sup>$\Delta$ PflipB</sup> the signals for  
213 M+4 and M+6 citrate were below the detection level, while the M+5 fraction was significantly  
214 decreased (Fig. 4C). In both experiments an increment of M+2 citrate was detected for  
215 3D7 <sup>$\Delta$ PflipB</sup> mutants compared to 3D7<sup>WT</sup>, however, with high variability between the two  
216 experiments (Fig. 4C). This labelling pattern, suggested a potential altered flux of glycolytic  
217 carbons into the TCA cycle. We further tested this possibility by quantitative western blot  
218 analysis of the enzymes operating the first steps of the TCA cycle. Interestingly, the 3D7 <sup>$\Delta$ PflipB</sup>  
219 mutant up-regulate the branched-chain  $\alpha$ -keto acid dehydrogenase (BCKDH) component E2,  
220 the first enzyme converting pyruvate to acetyl co-A (Oppenheim et al., 2014), while its  
221 apicoplast parallel PDC E2 displayed no differences in abundance (Fig. 5A). In contrast,  
222 isocitrate dehydrogenase (ICDH), which operates three steps downstream in the TCA cycle,  
223 displayed no differences in abundance when compared with 3D7<sup>WT</sup> (Fig. 5A). Collectively  
224 these results point to an altered flux of metabolites through the TCA cycle such that glycolytic  
225 derived carbon provide less input while glutamate becomes a major TCA cycle carbon input.

226

227

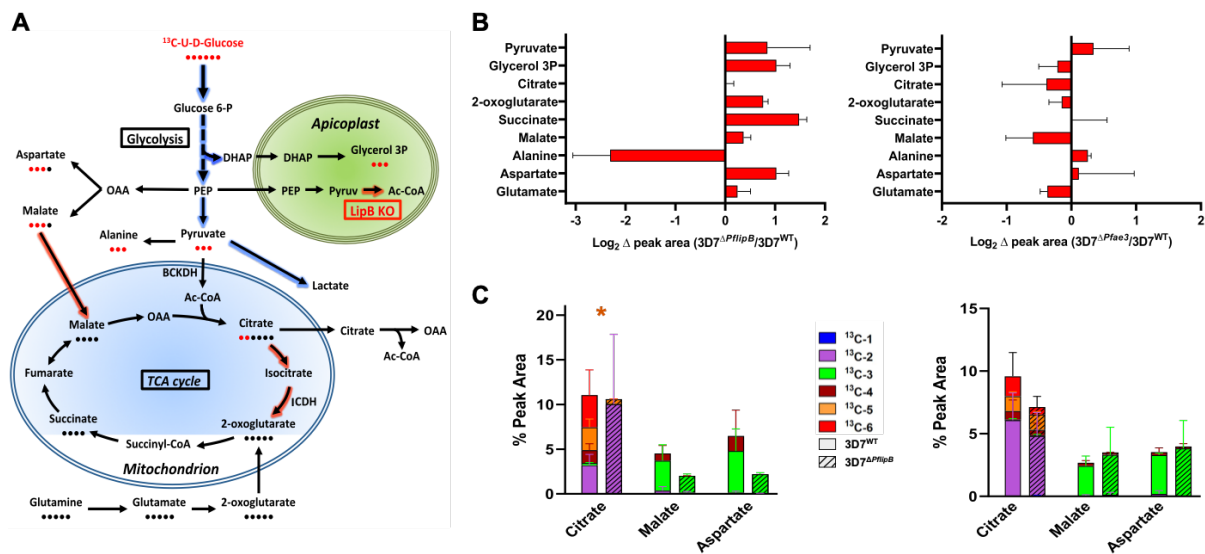

228

229 **Figure 4. Metabolomic analyses of 3D7 $\Delta$ PflipB mutants and 3D7<sup>WT</sup> parasites using <sup>13</sup>C-U-**  
 230 **D-glucose labelling.** Results from two independent targeted metabolomics experiments in  
 231 biological triplicates comparing 3D7 $\Delta$ PflipB mutants and 3D7<sup>WT</sup> after incubation in culture  
 232 medium containing 100% <sup>13</sup>C-U-D-glucose for 28 hours. (A) Schematics of the *P. falciparum*  
 233 central carbon metabolism pathways analysed here, highlighting the metabolic adaptations in  
 234 3D7 $\Delta$ PflipB mutant compared to wild-type parasites. Arrows shaded in red and blue respectively  
 235 correspond to decreased and increased in flux for each specific reaction. Red and black dots  
 236 under metabolite names respectively depict the number of labelled and unlabelled carbons,  
 237 based on the most abundant labelled form of the metabolite. Abbreviations: Ac-CoA: Acetyl-  
 238 CoA; BCKDH: branched-chain ketoacid dehydrogenase; DHAP: Dihydroxyacetone  
 239 phosphate; OAA: oxaloacetate; PEP: Phosphoenolpyruvate. (B) Relative intracellular levels  
 240 for each metabolite obtained by the sum of all the peak areas for each isotopologue of a  
 241 specific metabolite. The differences in abundance for each metabolite are expressed as Log<sub>2</sub>  
 242 of the 3D7 $\Delta$ PflipB/3D7<sup>WT</sup> (left graph) or Log<sub>2</sub>(3D7 $\Delta$ Pfae3/3D7<sup>WT</sup>) (right graph) mean ratio  $\pm$  SD  
 243 (n=2). (C) Bar graphs summarising the percentage of isotopic incorporation in each identified  
 244 metabolite calculated from the chromatographic peak areas. The bars are divided to represent  
 245 the mean contribution (n=2) of the different isotopologues to each metabolite labelled fraction  
 246 and error bars are SD. Empty bars represent metabolites identified in 3D7<sup>WT</sup> parasites, while  
 247 dashed bars correspond to metabolites from 3D7 $\Delta$ PflipB mutants (left graph) or 3D7 $\Delta$ Pfae3  
 248 mutants (right graph). The variance of citrate M+5 fraction between mutants and 3D7<sup>WT</sup> is  
 249 depicted by an asterisk coloured with the corresponding legend colour and was analysed with  
 250 the Student t-test using GraphPad Prism 5; \*: P<0.05.  
 251

252 Lastly, we tested cofactors involved in carbon and energy metabolism, where we observed a  
 253 decrease in relative intracellular levels of ATP in 3D7 $\Delta$ PflipB, while all other cofactors tested  
 254 were unchanged (Fig. 5B). In addition, 3D7 $\Delta$ PflipB mutants had an increase in the ADP M+5  
 255 fraction (Fig. 5C). These results may suggest an increased ATP demand in the mutants.  
 256 Likewise, an observed increase in incorporation of glucose-derived fully labelled ribose,

257 contributing to the M+5 fraction of this metabolite, may point to an up-regulation of ADP  
 258 generation through the addition of the ribose to salvaged hypoxanthine.  
 259 In summary, the analysis of 3D7<sup>ΔPflipB</sup> mutant metabolism reveals an effect on the activity of  
 260 both glycolysis and the TCA cycle. The specificity of this phenotype compared to 3D7<sup>ΔPfae3</sup>  
 261 metabolism supports the role of LA biosynthesis in cellular homeostasis.

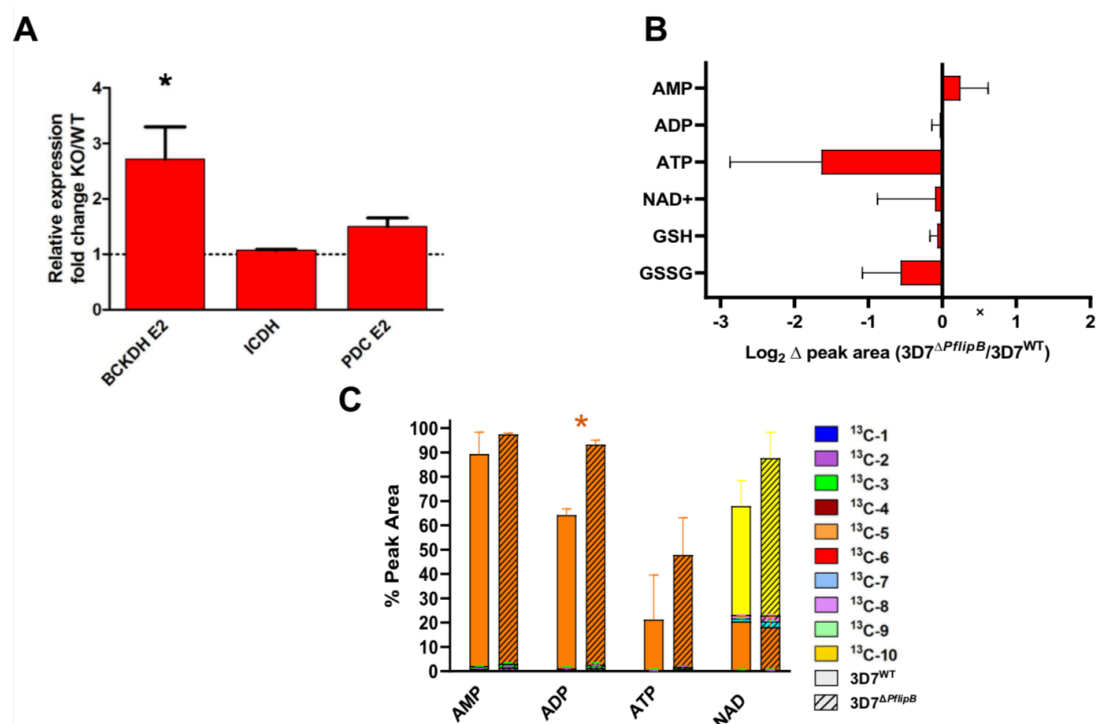

262

263 **Figure 5. Analysis of the expression of metabolic enzymes and the levels of cofactors**  
 264 **involved in glycolysis and in the TCA cycle. (A)** Relative protein levels for the mitochondrial  
 265 enzymes branched-chain ketoacid dehydrogenase (BCKDH E2), isocitrate dehydrogenase  
 266 (ICDH) and of the apicoplast enzyme dihydrolipoamide transacetylase (PDC E2). Data from  
 267 three experiments performed in biological triplicates (n=3) are shown as 3D7<sup>ΔPflipB</sup>/3D7<sup>WT</sup> ratio  
 268 of the actin-normalised mean fluorescent signals for each protein. Error bars represent SD.  
 269 The variance was analysed with the Student t-test using GraphPad Prism 5; \*: P<0.05. **(B)**  
 270 Relative intracellular levels of metabolic cofactors are represented as Log<sub>2</sub> of the  
 271 3D7<sup>ΔPflipB</sup>/3D7<sup>WT</sup> ratio of the means from two experiments in biological triplicates. The relative  
 272 mean levels are the sum of all peak areas relative to each isotopologue of each metabolite  
 273 (n=2). Error bars represent SD. **(C)** Bar graph summarising the percentage of isotope  
 274 incorporation in the identified cofactors AMP, ADP, ATP and NAD<sup>+</sup>. Data correspond to two  
 275 experiments performed in biological triplicates (n=2). The bars are divided to the mean  
 276 contribution of each isotopologue to the total labelled fraction and displays error bars  
 277 correspond to SD. Empty bars correspond to metabolites identified in 3D7<sup>WT</sup> parasites, while  
 278 dashed bars refer to metabolites from 3D7<sup>ΔPflipB</sup> mutants. The variance of each isotopologue  
 279 fraction between 3D7<sup>ΔPflipB</sup> and 3D7<sup>WT</sup> (n=2) is resented by the asterisk symbol (coloured  
 280 according to legend) and was analysed with the Student t-test using GraphPad Prism 5; \*:  
 281 P<0.05.

282

283

284 **Can the *lipB* mutant complete mosquito development?**

285 Despite the observed changes in redox regulation and metabolic fluxes, 3D7<sup>Δ*P**lipB*</sup> growth in  
 286 RBC culture was only mildly affected, showing a slight increase in growth (Günther et al.,  
 287 2007). Likewise, we found that at 30 hpi the 3D7<sup>Δ*P**lipB*</sup> mutant showed an increase in  
 288 differentiation into schizonts with a 6-hour advance compared to 3D7<sup>WT</sup> (Fig. S4A). This  
 289 accelerated differentiation resulted in faster completion of the trophozoite stage and of the  
 290 whole asexual cycle but had no effect on continuous growth in culture and no differences in  
 291 the average number of merozoites (Fig. S4B). We thus investigated the development of *lipB*-  
 292 deleted parasites in mosquitoes. For this analysis, a second *lipB* deletion line was generated  
 293 by double-crossover gene deletion (Fig. S5) in the NF54 background (NF54<sup>Δ*P**lipB*</sup>), which unlike  
 294 3D7 parasites, is able to infect mosquitoes. Parasites were maintained in media containing  
 295 10% human serum, with the aim of them retaining their capacity to form mature gametocytes.  
 296 The deletion of *lipB* did not appear to overtly influence sexual commitment in the parasites  
 297 and mature gametocytes developed as in NF54<sup>WT</sup> (Fig. 6, Table 1).

298

299 **Table 1: Summary of mosquito infection attempts with NF54<sup>Δ*P**lipB*</sup>**

| Stage V gametocytemia in cultures |               | Final concentration of stage V gametocytemia in the infectious blood meals |                | Wet mount exflagellation of infectious blood meal per field (x40 phase contrast) |              | Sporozoites/mosquito |               |
|-----------------------------------|---------------|----------------------------------------------------------------------------|----------------|----------------------------------------------------------------------------------|--------------|----------------------|---------------|
| NF54                              | NF54 LipB KO  | NF54                                                                       | NF54 LipB KO   | NF54                                                                             | NF54 LipB KO | NF54                 | NF54 LipB KO* |
| 0.40%                             | 1.62%         | 0.11%                                                                      | 0.11%          | 5.2                                                                              | 11.7         | 106,543              | 0             |
| 1.37%                             | 0.63%         | 0.12%                                                                      | 0.12%          | 8.1                                                                              | 6.3          | 150,178              | 0             |
| 1.45%                             | 0.75%         | 0.11%                                                                      | 0.11%          | 9.3                                                                              | 4.9          | 180,991              | 0             |
| 0.92%                             | 0.93%         | 0.10%                                                                      | 0.10%          | 1.9                                                                              | 2.7          | 109,975              | 0             |
| --                                | 0.87%         |                                                                            | 0.10%          |                                                                                  | 9.4          |                      | 0             |
| --                                | 1.10%         |                                                                            | 0.12%          |                                                                                  | 5            |                      | 0             |
| --                                | 1.03%         |                                                                            | 0.12%          |                                                                                  | 5.6          |                      | 0             |
| 1.04% ± 0.24%                     | 0.99% ± 0.12% | 0.11% ± 0.004%                                                             | 0.11% ± 0.003% | 6.1 ± 1.7                                                                        | 6.5 ± 1.2    | 136,922 ± 17,717     | 0 ± 0         |

300 Each row represents a separate experiment, with parental NF54 included in the first four.  
 301 Despite equivalent numbers of mature gametocytes and rates of exflagellation of male  
 302 gametes in comparison with parental NF54 parasites, the LipB KO parasites failed to produce  
 303 any salivary gland sporozoites, as determined from dissection and counting of 20 infected  
 304 Anopheles mosquitoes per parasite line per experiment. The bottom row shows composite  
 305 mean±SEM data.

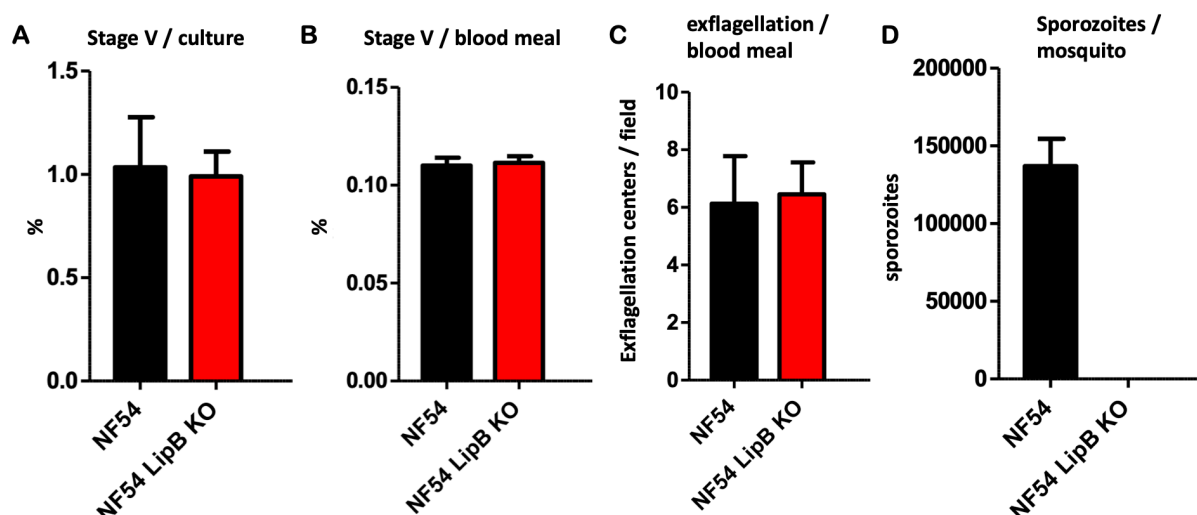

306  
307  
308

**Figure 6. Bar graphs representing the data from Table 1.**

309 This allowed us to proceed to evaluate parasite development in the mosquito. Seven mosquito  
310 infection experiments were performed with NF54<sup>ΔPflipB</sup> gametocytes (Table 1). While midgut  
311 oocysts were detectable in all experiments, no sporozoites were detected in any of the infected  
312 mosquitoes in any of the seven experiments, while an average of 136,922 ± 17,717  
313 sporozoites was detected in four experiments performed with the parental NF54 (Table 1, Fig.  
314 6). These data indicated a major defect in development in the mosquito in the NF54<sup>ΔPflipB</sup>  
315 parasites. To explore this further, we examined the morphology of the midgut oocysts (Fig. 7).  
316 NF54<sup>ΔPflipB</sup> parasites were unable to form midgut oocyst sporozoites, suggesting an attenuated  
317 sexual development for this line that could not complete its transmission cycle in the  
318 *Anopheles* vector.

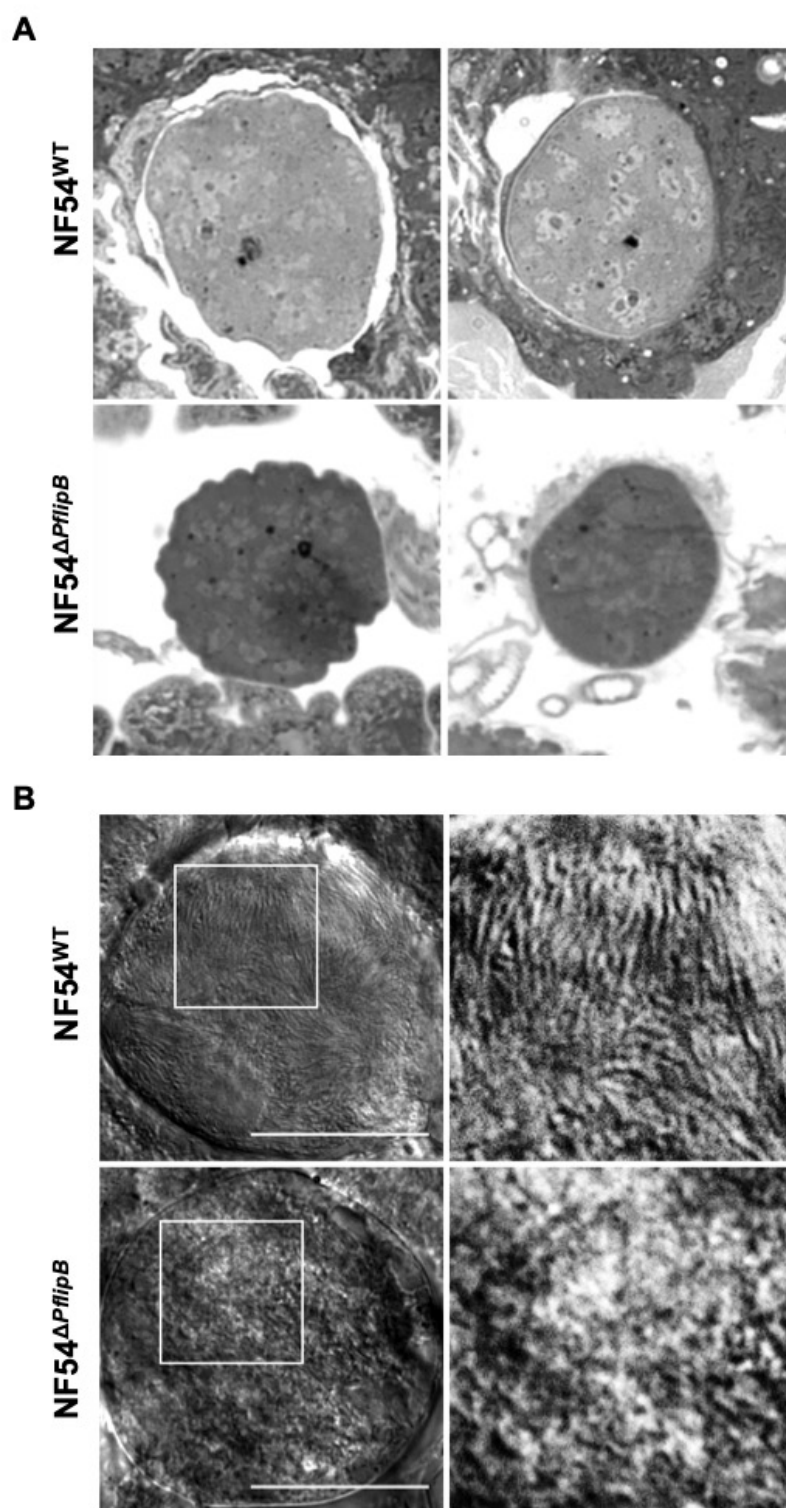

319

320 **Figure 7. Oocyst morphology on day 7 and 13 post-feeding of gametocytes to**  
321 ***Anopheles* mosquitoes shows a defect in sporozoite development for LipB knockout**  
322 **parasites. (A) Two representative light microscopy images of NF54<sup>ΔlipB</sup> and of NF54<sup>WT</sup> oocysts**  
323 **on day 7 post feeding. (B) A representative DIC microscopy image of NF54<sup>ΔlipB</sup> and of NF54<sup>WT</sup>**  
324 **oocysts on day 13. The insets are shown in white squares. Scale bar 25 μm. The NF54<sup>ΔPflipB</sup>**  
325 **oocysts show malformation in both methods and time points.**

## 326 DISCUSSION

327 The cellular redox balance of *Plasmodium* parasites is constantly under threat of oxidative  
328 stress generated by the metabolic functions of the parasite and by the metabolic activities and  
329 defence mechanisms of the host (Becker et al., 2004; Müller, 2015; Nepveu and Turrini, 2013;  
330 Patzewitz et al., 2013). Apicoplast-specific redox balance is an integral part of the overall  
331 cellular redox steady-state (Biddau et al., 2018; Kehr et al., 2010; Mohring et al., 2017). While  
332 fragmented information is available about the different apicoplast redox control pathways, their  
333 importance is evident in the series of specific antioxidant systems it hosts (Kehr et al., 2010)  
334 and in the redox regulators controlling its biogenesis (Biddau et al., 2018). Likewise,  
335 apicoplast-hosted pathways are coupled to redox reactions, including the biosynthesis of  
336 isoprenoid precursors, which is coupled to the reduction of NADP<sup>+</sup> to NADPH plus H<sup>+</sup> (Seeber  
337 et al., 2005; Seeber and Soldati-Favre, 2010), and the activity of PDC as discussed here (Fig.  
338 1). LA is proposed to contribute to redox regulation in other systems (Tibullo et al., 2017), and  
339 here we provide evidence in support of this role within the apicoplast of *Plasmodium*.

340

### 341 Evidence supporting the proposed role of LA as an apicoplast redox regulator

342 LA is a powerful antioxidant with low redox potential (Bilska and Włodek, 2005; Packer et al.,  
343 1995), which prompted us to test how interfering with LA biosynthesis affected apicoplast  
344 redox regulation. Our results revealed that the LipB deletion mutant (3D7<sup>ΔPflipB</sup>) shows  
345 transcriptional changes of the apicoplast redox enzymes peroxidase-like enzyme TPx<sub>GI</sub>,  
346 thioredoxin ATrx2, and the peroxiredoxin AOP (Fig. 2A). We propose that these changes  
347 promote apicoplast redox homeostasis in response to the oxidative stress caused by the  
348 depletion of the LA antioxidant function. In support of this hypothesis, up-regulation of TPx<sub>GI</sub>  
349 also occurs in response to other oxidative stresses in *P. falciparum* (Akide-Ndunge et al.,  
350 2009). Likewise, we recently reported that the ortholog of PfATrx2 in the related parasite  
351 *Toxoplasma gondii* (TgATrx2) controls apicoplast gene expression, likely via a redox state-  
352 controlled interaction with proteins in transit to the apicoplast lumen (Biddau et al., 2018). If  
353 PfATrx2 performs a similar function, then the changes in its expression in 3D7<sup>ΔPflipB</sup> may serve

354 to control protein transit to the apicoplast lumen in response to organelle redox imbalance.  
355 The different roles of TPX<sub>GI</sub> and ATrx2 may account for the different pattern in their  
356 transcriptional changes.  
357 Our observations provide evidence linking the depletion of apicoplast LA to changes in the  
358 apicoplast antioxidant response (Fig. 2A). We thus suggest that the apicoplast PpPDC E2  
359 enzyme may operate as an apicoplast antioxidant through its prosthetic LA. Examples of  
360 DHLA acting as an electron donor to both GSH and thioredoxin systems have been previously  
361 described in other organisms (Packer et al., 1995). DHLA bound to PDC-E2 and to  $\alpha$ -  
362 ketoglutarate dehydrogenase (KGDH) acts as an electron donor to glutaredoxins in an *E. coli*  
363 mutant with both the thioredoxin and the GSH systems were disrupted (Feeney et al., 2011).  
364 Likewise, *Mycobacterium tuberculosis* KGDH E2 uses DHLA to transfer electrons received  
365 from E3 to peroxiredoxins and contributes to antioxidant defence (Bryk et al., 2002).  
366 Additionally, KADH E2-mediated reduction of thioredoxins was observed in mammals (Bunik  
367 and Follmann, 1993). A similar redox regulatory role of the apicoplast PDC E2 may explain  
368 why it is expressed during the intra-erythrocytic stages (Foth et al., 2005; McMillan et al.,  
369 2005), despite the dispensability of fatty acid biosynthesis in this stage (Vaughan et al., 2009).  
370 Our attempts to delete PDC E2 in *P. falciparum* using gene replacement were unsuccessful  
371 (data not shown), raising the possibility that its role during intra-erythrocytic development is  
372 essential. In agreement with this observation, *Pfpdce2* was proposed to be essential during  
373 intra-erythrocytic development in a recent whole-genome random mutagenesis screen (Zhang  
374 et al., 2018). This hypothetical role for LA in redox regulation raises questions about the  
375 sources of electrons for LA/DHLA recycling. This might not be attributed exclusively to the flux  
376 of glycolytic pyruvate to PDC as this was suggested to contribute to a build-up of acetyl-CoA  
377 in the organelle (Lim and McFadden, 2010). A possible alternative candidate for LA/DHLA  
378 recycling might be the apicoplast-targeted GSH reductase (GR) (Müller, 2015). The GR-  
379 mediated reduction of LA was demonstrated in rats, and, in particular, the use of NADPH +H<sup>+</sup>  
380 as an electron donor was described in mitochondrial fractions (Haramaki et al., 1997; Pick et  
381 al., 1995).



382 **Changes in the expression of cytosolic redox regulators and in the asexual cycle**  
383 **progression upon *lipB* deletion suggest putative apicoplast-to-cytosol signalling**

384 Our data identified changes in cytosolic antioxidant expression in 3D7<sup>Δ*Pf*lipB</sup> parasites. Both  
385 enzymes for which we observed upregulation, GST and 1-CysPx (Fig. 2B), are highly  
386 abundant in the *P. falciparum* cytosol (Liebau et al., 2002), and both have demonstrated  
387 antioxidant activity in this compartment (Deponete and Becker, 2005; Harwaldt et al., 2002;  
388 Krnajska et al., 2001; Liebau et al., 2002). One potential explanation for this phenotype is  
389 plastid-to-cytosol redox signalling, as described in plant chloroplasts (reviewed in Dietz et al.,  
390 2016). In *Arabidopsis thaliana*, chloroplast-originated H<sub>2</sub>O<sub>2</sub> signal induces upregulation of the  
391 expression of genes encoding different GSTs as well as enzymes involved in glycolysis and  
392 the pentose phosphate pathway (PPP) (Sewelam et al., 2014). Moreover, chloroplast-  
393 originated ROS signalling induce changes in the cell cycle progression (Bode et al., 2016). It  
394 is thus possible that the accelerated cell cycle progressions described before for 3D7<sup>Δ*Pf*lipB</sup>  
395 (Günther et al., 2007) may be triggered in response to a redox signalling originating from the  
396 apicoplast. Furthermore, trophozoites appear to be the asexual stage most affected by redox  
397 imbalance in culture (Akide-Ndunge et al., 2009), which is in line with our observations of  
398 accelerated differentiation at that stage in the mutant (Fig. S4).

399

400 **Deletion of *lipB* affects energy metabolism in *P. falciparum* blood stages.**

401 Metabolic analysis of 3D7<sup>Δ*Pf*lipB</sup> mutants highlighted an increased glycolytic activity, which is  
402 the main energy releasing pathway in blood stage *P. falciparum* (Salcedo-Sora et al., 2014).  
403 Increased glycolytic activity in 3D7<sup>Δ*Pf*lipB</sup> mutants was mostly evident through increased  
404 glucose demand and increased lactate production via spent medium analysis (Fig. 3).

405 A potential model tying these phenotypes together goes as follows: changes to apicoplast  
406 redox balance due to depletion of LA also induce changes in cytosolic redox through plastid-  
407 to-cytosol signalling. This signal leads to temporary accelerated differentiation, which results  
408 in a higher demand on glycolysis. However, we cannot rule out that the changes in cytosolic  
409 redox regulator expression and asexual cycle progression are the result of the metabolic

410 changes taking place in this mutant and not the cause. The uncertainty stems from the  
411 potential dual roles of LA in i/ regulating redox and ii/ supporting PDC dependent fatty acid  
412 synthesis. However, accumulating evidence suggests that the latter is not essential during  
413 intra-erythrocytic development (Cobbold et al., 2013) unless fatty acid starvation occurs (Botté  
414 et al., 2013). We thus propose that the changes in carbon metabolism observed upon *lipB*  
415 deletion are not the consequence of disruption of fatty acid metabolism. This hypothesis is  
416 further supported by the absence of similar carbon metabolic variations in the 3D7<sup>ΔPfae3</sup> mutant  
417 (Fig. S2), which lacks a fully-functional PDC due to the deletion of aE3, and which has only  
418 modest changes in cytosolic redox (Laine et al., 2015).

419

#### 420 **How is *lipB* deletion influencing the TCA cycle?**

421 The main change we detected in the TCA cycle using targeted metabolomics analysis was in  
422 the labelling of citrate, the first product of the cycle. In 3D7<sup>ΔPflipB</sup> mutants, citrate presented  
423 mainly as M+2 labelling and showed a significant decrease in M+5 while all other  
424 isotopologues for this metabolite were below detection levels (Fig. 4C). These results point to  
425 a change in the cycle flow, whereby unlabelled glutamate and M+2 pyruvate are likely  
426 generating unlabelled and M+2 labelled citrate (Fig 4A). Furthermore, the apparent absence  
427 of M+4 and M+6 citrate fractions may suggest a non-cyclic pathway that starts with 2-  
428 oxoglutarate from glutamine and stops at citrate. The increase in relative intracellular levels  
429 for 2-oxoglutarate and succinate further support that the cycle is fuelled mainly by the  
430 glutamate branch.

431 The link between *lipB* deletion and the changes seen in the TCA cycle is unclear, and the lack  
432 of change in ICDH protein levels (Fig. 5A) is puzzling. One possible explanation is that the  
433 enzymatic activity of ICDH, or indeed citrate synthase and aconitase, may be inhibited in  
434 response to the observed cellular redox changes. Studies on plant mitochondria highlight the  
435 role of thiol redox switches in adjusting mitochondrial function in light of external stresses  
436 (reviewed in Nietzel et al., 2017), and citrate synthase, aconitase and ICDH are all substrate

437 for thiol based redox regulation (Yoshida et al., 2013; Schmidtman et al., 2014; Yoshida and  
438 Hisabori, 2014).

439 Interestingly, alongside the altered levels of citrate labelling, we observed an increase in  
440 relative levels of BCKDH E2 (Fig. 5A) and no change in the total relative intracellular levels of  
441 citrate (Fig. 4B). Previous studies suggested that citrate could take part in a malate shuttle,  
442 whereby cytosolic citrate is used to generate oxaloacetate and acetyl-CoA, which in turn take  
443 part in carbon fixation and protein acetylation (Cobbold et al., 2013; Storm et al., 2014). The  
444 apparent absence of M+4 and M+6 citrate in 3D7<sup>ΔPflipB</sup> mutants is in line with this scenario,  
445 and could suggest that the citrate fraction that is not cycling in the TCA cycle but may instead  
446 be channelled towards this malate shuttle. If true, this would result in increased availability of  
447 cytosolic acetyl-CoA, which in turn may affect histone acetylation and thus gene expression  
448 patterns (Cobbold et al., 2016). This hypothetical model could explain the altered progression  
449 through the cell cycle, which typically depends on very tight regulation of gene expression  
450 (Bozdech et al., 2003).

451

## 452 **LA biosynthesis is essential to complete sporogony**

453 We identified a severe defect in sporozoite production in the NF54<sup>ΔPflipb</sup> mutant (Table 1, Fig.  
454 6,7), despite the fact that normal numbers of oocysts were produced. This observation raises  
455 the possibility that LA synthesis in the apicoplast is essential for sporoblast development,  
456 through a yet undefined mechanism. This finding is surprising considering the evidence from  
457 the rodent parasite *P. berghei*, where deletion of *lipB* caused no defect to the production of  
458 salivary gland sporozoites but showed a moderate defect in liver-stage development (Falkard  
459 et al., 2013). This is not the first example for such a discrepancy, PDC E1α is dispensable for  
460 mosquito development in the rodent malaria parasite *P. yoelii* but was necessary for  
461 sporozoite maturation in *P. falciparum* (Cobbold et al., 2013). Taken together these findings  
462 point to different dependency of human and rodent malaria on PDC enzymes for development  
463 in the mosquito. A possible reason for this difference may be the increased number of

464 sporozoites produced per oocyst, which is four-fold higher in the human malaria parasites *P.*  
465 *falciparum* (Rungsiwongse and Rosenberg, 1991) than in rodent malaria parasites (Lindner et  
466 al., 2013; Shimizu et al., 2010). High sporozoite numbers in rodent malaria oocysts may  
467 require enhanced metabolism, which would depend on both PDC activity and a functional  
468 redox regulation network.

469

## 470 **Material and Methods**

### 471 **Parasite culture and assessment of growth**

#### 472 - ***P. falciparum* culturing and synchronization**

473 *P. falciparum* 3D7 parasites (isolated in the Netherlands) were cultured in RPMI 1640  
474 (Invitrogen) supplemented with 11 mM D-Glucose (Sigma Aldrich), 0.5% w/v AlbuMAX II  
475 (Invitrogen), 200 mM hypoxanthine (Sigma Aldrich), and 20 mg/ml gentamycin (PAA) in  
476 human erythrocytes at 5% haematocrit (Trager and Jensen, 1976). Parasites were cultured  
477 maintaining a reduced oxygen atmosphere (1% O<sub>2</sub>, 3% CO<sub>2</sub> and 96% N<sub>2</sub>) and a constant  
478 temperature of 37°C (referred to as standard procedures). Parasitemias were determined by  
479 microscopy analysis of Giemsa-stained thin smears and synchronisations were performed  
480 following the sorbitol procedure (Lambros and Vanderberg, 1979). Tighter synchronisation  
481 was obtained by a combination of sorbitol treatment with magnetic-activated cell sorting  
482 (MACS) using LD columns (Miltenyi Biotech). Briefly, sorbitol-synchronised parasites were  
483 maintained in culture until they reached the early ring stage. Cultures were synchronised twice  
484 with sorbitol 6 hours apart and then cultured until they reached the late schizont stage.  
485 Schizonts were purified over a MACS column once cultures had reached a schizont:ring ratio  
486 of 1:2. Schizonts were then placed in culture for 1 hour with gentle shaking and cultures  
487 synchronised again using the sorbitol method to obtain highly synchronous ring stages with 1-  
488 hour synchrony. Highly-synchronous parasites were used for all time point experiments and  
489 RNA extractions, with triplicate cultures for each condition.

490

491

## 492 - **Spent medium metabolite quantification**

493 Analyses of D-glucose and L-lactate concentrations from spent culture medium samples were  
494 performed using the D-Glucose-HK and L-Lactic acid kits from Megazyme following  
495 manufacturer's protocol. Briefly, parasite cultures for each condition were synchronised using  
496 a double sorbitol treatment (Lambros and Vanderberg, 1979) with a 6 hour window, and split  
497 in triplicate cultures at the same parasitemia. At each time point, an aliquot of the culture was  
498 collected from each condition and erythrocytes were pelleted by centrifuging at 1000g for 5  
499 min. The resulting supernatant was then stored at -20°C. For the enzymatic assay, parasite  
500 spent medium samples were diluted by 1:6 with double distilled water.

501

## 502 **Evaluation of antioxidant gene expression**

### 503 - **RT-qPCR**

504 Highly synchronous parasites (see above) were cultured in triplicate for each condition until  
505 they reached 26, 30 and 34 hpi. Pellets of infected RBCs at 6-8% parasitemias were then  
506 washed three times in PBS and kept at -80°C. Nucleic acids were extracted using the RNeasy  
507 kit (QIAGEN). Contaminating DNA was removed using the Turbo DNA-free kit (Thermo Fisher  
508 Scientific). RNA samples were then reverse transcribed using the RETRO-script kit (Thermo  
509 Fisher Scientific). qPCR was performed using the Power SYBR Green Master Mix (Thermo  
510 Fisher Scientific) adding 20 ng of cDNA for each reaction and 300 nM of each primer (see  
511 Table S1). All reactions were run in a 7500 Real-Time PCR System (Applied Biosystems).  
512 The calculation of relative gene expression was performed using the  $\Delta\Delta(Ct)$  method (Livak  
513 and Schmittgen, 2001).

### 514 - **Protein extraction and quantitative fluorescent western blot**

515 For protein extraction, saponin-lysed parasite pellets were resuspended in 2D lysis buffer (100  
516 mM Hepes pH 7.4, 5 mM MgCl<sub>2</sub>, 10 mM EDTA, 0.5% (v/v) Triton X-100, 5 µg/ml RNase A, 1x

517 complete protease inhibitor cocktail (Roche) in ddH<sub>2</sub>O water). Samples were subjected to  
518 three rounds of freeze-thaw in dry ice and incubated at 4°C for 5 min in a sonicated water  
519 bath. Samples were then centrifuged at 13000 g for 20 min at 4°C. Supernatants containing  
520 protein fractions were quantified using the Protein Assay kit (Bio-Rad), with bovine serum  
521 albumin used to generate a reference quantification curve.

522 Western blot analysis was performed by separating 20 µg of protein sample by SDS-PAGE  
523 with NuPage Novex 4–12% and 15% (w/v) Bis-Tris gels (Invitrogen). Separated proteins were  
524 transferred to Protran nitrocellulose membranes (Schleicher & Schuell) using a Transblot  
525 semi-dry transfer system (BioRad). Membranes were blocked with 5% (w/v) dried skimmed  
526 milk in PBS for 1-18 hours and incubated for 1 hour with two or more primary antibodies.  
527 Primary antibodies used for relative quantification included *P. falciparum* rabbit anti-actin  
528 antibody (1:12,000, loading control), *P. falciparum* rabbit anti-1-CysPx (1-Cys peroxiredoxin)  
529 antibody 1:50,000; *P. falciparum* rabbit anti-2-CysPx (2-Cys peroxiredoxin) antibody at  
530 1:70,000; *P. falciparum* rabbit anti-BCKDH E2 antibody at 1:5,000; *P. falciparum* rabbit anti-  
531 isocitrate dehydrogenase antibody at 1:10,000 and *P. falciparum* rabbit anti-PDC E2 lipoyl  
532 domain antibody at 1:250. Membranes were washed three times in PBS containing 0.2% (v/v)  
533 Tween 20 and 2.5% (w/v) dried skimmed milk. Blots were then probed with IR dye-conjugated  
534 antibody (1:10,000, IRDye800CW goat anti-rabbit antibody; LI-COR Biosciences) for 1 hour  
535 and washed again twice. Membranes were loaded in an Odyssey SA scanner (LI-COR  
536 Biosciences) and fluorescent signal intensities quantified with the Image Studio software (LI-  
537 COR Biosciences). All antibodies were custom made by Eurogentec.

## 538 **Metabolomics experiment and analysis**

### 539 - **<sup>13</sup>C-U-D-glucose labelling experiment setup**

540 Parasites were cultured until parasitemias attained 6-8%. Two sorbitol treatments were  
541 performed at approximately 8 and 14 hpi. After synchronisation, triplicate parasites cultures  
542 were set using a medium where D-glucose was replaced with <sup>13</sup>C-U-D-glucose (99%, CK Gas  
543 Products Ltd) and the haematocrit was set to 1%. A control culture of uninfected RBCs was

544 prepared with the same conditions. All cultures were incubated for 20 hours following standard  
545 procedures until late trophozoites. At this point, parasite culture metabolism was rapidly  
546 quenched at 4°C in a bath of dry ice and 70% ethanol (Vincent and Barrett, 2015). Erythrocyte  
547 pellets were then obtained and washed in ice-cold PBS by centrifugation at 800g for 5 min at  
548 4°C. Infected RBCs in the pellets were enriched using MACS LD column purification (Miltenyi  
549 Biotech) and a QuadroMACS magnet (Miltenyi Biotech) with all steps performed at 4°C.  
550 Enriched samples were quantified using a Neubauer cell counting chamber and a Scepter 2.0  
551 Handheld Automated Cell Counter (Millipore) to have  $2.0 \times 10^8$  infected RBC per sample. The  
552 same number of uninfected RBCs was collected as a control. All the samples were then added  
553 to a solution of HPLC-grade chloroform:methanol:water (1:3:1; v/v/v), at concentration of  
554  $2 \times 10^8$  parasites per 0.5 mL solution, incubated in ice in a sonicating water bath for 2 min and  
555 extracted for 1 hour at 4°C and 1500 rpm on an orbital shaker. After extraction, samples were  
556 centrifuged at 13000g for 20 min at 4°C, and supernatants transferred into glass mass  
557 spectrometry vials (Thermo) and stored at -80°C until LC-MS analysis.

#### 558 - **Liquid chromatography-mass spectrometry analyses**

559 Metabolomics analyses were performed by liquid chromatography-mass spectrometry using  
560 an Ultimate 3000 LC system (Dionex, UK) connected to a Q Exactive HF Hybrid Quadrupole-  
561 Orbitrap mass spectrometer, (Thermo Fisher Scientific). The system was controlled by the  
562 software Chromeleon (Dionex, UK) and Xcalibur (Thermo Scientific), acquiring both positive  
563 and negative ionisation mode. Chromatographic separation was performed with a ZIC-pHILIC  
564 chromatography column (150 mm  $\times$  4.6 mm  $\times$  65  $\mu$ m; Sequant, Umeå, Sweden) using a two  
565 solvent system consisting of solvent A: 20 mM ammonium carbonate and solvent B:  
566 acetonitrile. The table shows chromatographic conditions:

| Solvent A (%) | Solvent B (%) | Time (min) |
|---------------|---------------|------------|
| 20            | 80            | 0          |
| 80            | 20            | 30         |
| 95            | 5             | 31         |
| 95            | 5             | 35         |
| 20            | 80            | 36         |
| 20            | 80            | 46         |

567

568        -    **Metabolomic data analysis**

569    Vendor-specific raw data were initially centroided and converted into the open format mzXML  
570    for subsequent processing. PeakML files (Scheltema et al., 2011) were then generated by  
571    extracting the chromatographic peaks contained in the mzXML files using the detection  
572    algorithm from XCMS (Tautenhahn et al., 2008). The data processing pipeline mzMatch.R  
573    (Jankevics et al., 2012) was used to sort and combine all PeakML files corresponding to  
574    replicates and to exclude all non-reproducible data. Further steps of noise-filtering, gap-filling,  
575    and metabolite identification were performed on PeakML files utilising data obtained from  
576    metabolic standards run in parallel. For each metabolite of interest, the proportions of each  
577    isotopologue and its relative abundance in the sample were determined. The  
578    PeakML.Isotope.TargetedIsotopes function of mzMatch-ISO (Chokkathukalam et al., 2013)  
579    was used to scan the PeakML files for labelled metabolite quality and quantity. All metabolites  
580    of interest in this study were reliably identified by comparison of the chromatographic retention  
581    times and the m/z values with an authentic metabolic standard processed in parallel. These  
582    should be then considered as “identified compounds” or level 1 according to the Metabolomic  
583    Standard Initiative (Sumner et al., 2007). All metabolomics data was corrected for natural  
584    carbon isotope abundance and reagent impurity using the software IsoCor (Millard et al.,  
585    2019).

586    **Double cross-over deletion of *PfLipB* in NF54 strain by *Cre-loxP* system**

587    *P. falciparum* strain NF54 was cultured in complete medium containing RPMI 1640 salts and  
588    10% heat-inactivated human serum (Graves et al., 1984). The strategy for double cross over  
589    deletion of *pflipB* using *Cre-loxP* is depicted in **Fig. S5**. Briefly, we employed a double  
590    crossover recombination strategy to generate parasite lines lacking a functional *pflipB* locus  
591    (PlasmoDB ID: PF3D7\_0823600). A 0.5 kb fragment of *pflipB*, PCR-amplified from NF54  
592    gDNA using primers p1/p2 (Table S1), was cloned into PCC1-*cdup-hdhfr*-DXO between the  
593    *SacII* and *AflII* sites and served as the homology region for the first cross-over (O'Neill et al.,  
594    2011). The second homologous fragment (0.5 kb) was PCR amplified using primers p3/p4 and



595 cloned between *EcoRI* and *AvrII* sites to give rise to 8.5 kb PCC1-*cdup*-*hdhfr*- $\Delta$ *lipB* plasmid.  
596 50 $\mu$ g of this plasmid was used to transfect NF54 strain by electroporation and transformed  
597 parasites were selected with 1.5 nM WR99210. Drug pressure was maintained until 7 days  
598 and parasites were then cultured in drug-free medium up to day 27 when the parasites  
599 reappeared. WR99210-resistant parasites were then treated with 1.0  $\mu$ M 5-Fluorocytosine  
600 (in DMSO) to remove single crossover-integrated plasmid and episomal forms, both of which  
601 contain the suicidal *cdup* marker (Maier et al., 2006). To unmark the parasites, pTET-BSD-  
602 *Cre* (kind gift from Allan Cowman) was mobilized into recombinant NF54 and cultured in 2.5  
603  $\mu$ M blasticidin S-hydrochloride for 7 days, after which single-cell cloning was performed  
604 (Goodyer and Taraschi, 1997).

#### 605 **Generation of *Pf* $\Delta$ *lipB* gametocytes and production of salivary gland sporozoites**

606 Gametocytes were induced from *Pf* $\Delta$ *lipB* and WT NF54 parasite lines by multiple rounds of  
607 sub-culturing for 14-18 days with nutrient deprivation, as described (Ponnudurai et al., 1986).  
608 Gametocyte induction and maturation was monitored microscopically by Giemsa-stained thin  
609 blood smears from culture samples. Mature gametocyte pellets were mixed with fresh O-type  
610 Rh<sup>+</sup> blood and human serum to produce an artificial blood meal at approximately 50%  
611 hematocrit for mosquito feeds. The final concentration of stage V gametocytes in artificial  
612 blood meals was 1.0% $\pm$ 0.1% (mean $\pm$ SEM across 7 experiments), which was equivalent to the  
613 gametocyte numbers observed with NF54 (**Table S1**). *Anopheles stephensi* mosquitoes were  
614 fed 3-5 days after their emergence from pupae. Fed mosquitoes were maintained for 13–16  
615 days before recovery of salivary gland sporozoites (SPZ) by hand dissection.

#### 616 **Ultra-structure analysis of midgut oocysts**

617 The infected midgut oocysts were fixed in 4%/0.1% formaldehyde/glutaraldehyde and  
618 immersed in a 50:50 glycerol/water solution for Differential Interference Contrast (DIC)  
619 imaging. Using a Nikon Ti Eclipse inverted microscope, cut midgut sections were pre-screened  
620 for the presence of oocysts at 10 $\times$  magnification using an automated tiling feature of the Nikon

621 NIS Elements 3.2 software. Individual oocysts were imaged at high magnification using a 60×  
622 NA 1.4 oil immersion objective with a matching DIC slider. Images were compiled using the  
623 NIH's ImageJ program.

624 Morphology of developing oocysts (Fig 6A) was done by fixing dissected mosquito midguts  
625 in 2.5% glutaraldehyde in PBS, and then in 0.5% OsO<sub>4</sub>, dehydration in an ethanol series,  
626 embedding in London Resin White, and semi-thin sections (400nm) were mounted on glass  
627 slides and stained with 0.5% toluidine blue (w/v): 0.1% Na<sub>2</sub>CO<sub>3</sub> (w/v) for 10 seconds, and  
628 then imaged on an Olympus BH-2 light microscope.

629

### 630 **Acknowledgements**

631 We would like to thank Dr Sujaan Das, Dr Mahmood Alam, Dr Lewis King and Dr Sonal  
632 Sethia for their help and advice. The research was supported by the European Community's  
633 Seventh Framework Programme [grant number FP7/2007-2013] under grant agreements No  
634 242095 and No ParaMet 290080 (MB), by Medical Research Council grant number  
635 MR/S024573/1 (LS), and by the NIH (R01 AI085584 to DAF). The Wellcome Centre for  
636 Integrative Parasitology is supported by core funding from the Wellcome Trust [104111].  
637 Finally, GIM was awarded Laureate Fellowship from the Australian Research Council and LS  
638 is a Royal Society of Edinburgh Personal Research Fellow.

639

640 **References**

- 641 Akide-Ndunge, O.B., Tambini, E., Giribaldi, G., McMillan, P.J., Müller, S., Arese, P.,  
642 Turrini, F., 2009. Co-ordinated stage-dependent enhancement of *Plasmodium*  
643 *falciparum* antioxidant enzymes and heat shock protein expression in parasites  
644 growing in oxidatively stressed or G6PD-deficient red blood cells. *Malar. J.* 8,  
645 113. doi:10.1186/1475-2875-8-113
- 646 Becker, K., Tilley, L., Vennerstrom, J.L., Roberts, D., Rogerson, S., Ginsburg, H.,  
647 2004. Oxidative stress in malaria parasite-infected erythrocytes: Host-parasite  
648 interactions. *Int. J. Parasitol.* doi:10.1016/j.ijpara.2003.09.011
- 649 Biddau, M., Bouchut, A., Major, J., Saveria, T., Tottey, J., Oka, O., Van-Lith, M.,  
650 Jennings, K.E., Ovciarikova, J., DeRocher, A., Striepen, B., Waller, R.F.,  
651 Parsons, M., Sheiner, L., 2018. Two essential Thioredoxins mediate apicoplast  
652 biogenesis, protein import, and gene expression in *Toxoplasma gondii*. *PLoS*  
653 *Pathog.* 14, e1006836. doi:10.1371/journal.ppat.1006836
- 654 Biddau, M., Sheiner, L., 2019. Targeting the apicoplast in malaria. *Biochem. Soc.*  
655 *Trans.* 47, 973–983. doi:10.1042/BST20170563
- 656 Bilska, A., Włodek, L., 2005. Lipoic acid - the drug of the future? *Pharmacol. Rep.*  
657 57, 570–7.
- 658 Bode, R., Ivanov, A.G., Hüner, N.P.A., 2016. Global transcriptome analyses provide  
659 evidence that chloroplast redox state contributes to intracellular as well as long-  
660 distance signalling in response to stress and acclimation in *Arabidopsis*.  
661 *Photosynth. Res.* 128, 287–312. doi:10.1007/s11120-016-0245-y
- 662 Botté, C.Y., Yamaryo-Botté, Y., Rupasinghe, T.W.T., Mullin, K.A., MacRae, J.I.,  
663 Spurck, T.P., Kalanon, M., Shears, M.J., Coppel, R.L., Crellin, P.K., Maréchal,  
664 E., McConville, M.J., McFadden, G.I., 2013. Atypical lipid composition in the  
665 purified relict plastid (apicoplast) of malaria parasites. *Proc. Natl. Acad. Sci. U.*  
666 *S. A.* 110, 7506–11. doi:10.1073/pnas.1301251110
- 667 Boucher, M.J., Ghosh, S., Zhang, L., Lal, A., Jang, S.W., Ju, A., Zhang, S., Wang,  
668 X., Ralph, S.A., Zou, J., Elias, J.E., Yeh, E., 2018. Integrative proteomics and  
669 bioinformatic prediction enable a high-confidence apicoplast proteome in  
670 malaria parasites. *PLoS Biol.* 16, e2005895. doi:10.1371/journal.pbio.2005895
- 671 Bozdech, Z., Llinás, M., Pulliam, B.L., Wong, E.D., Zhu, J., DeRisi, J.L., 2003. The  
672 transcriptome of the intraerythrocytic developmental cycle of *Plasmodium*  
673 *falciparum*. *PLoS Biol.* 1, E5. doi:10.1371/journal.pbio.0000005
- 674 Bryk, R., Lima, C.D., Erdjument-Bromage, H., Tempst, P., Nathan, C., 2002.  
675 Metabolic enzymes of mycobacteria linked to antioxidant defense by a  
676 thioredoxin-like protein. *Science* 295, 1073–7. doi:10.1126/science.1067798
- 677 Bunik, V., Follmann, H., 1993. Thioredoxin reduction dependent on alpha-ketoacid  
678 oxidation by alpha-ketoacid dehydrogenase complexes. *FEBS Lett.* 336, 197–  
679 200. doi:10.1016/0014-5793(93)80801-Z
- 680 Bushell, E., Gomes, A.R., Sanderson, T., Anar, B., Girling, G., Herd, C., Metcalf, T.,

- 681 Modrzynska, K., Schwach, F., Martin, R.E., Mather, M.W., McFadden, G.I.,  
682 Parts, L., Rutledge, G.G., Vaidya, A.B., Wengelnik, K., Rayner, J.C., Billker, O.,  
683 2017. Functional Profiling of a *Plasmodium* Genome Reveals an Abundance of  
684 Essential Genes. *Cell* 170, 260-272.e8. doi:10.1016/j.cell.2017.06.030
- 685 Chan, M., Sim, T.-S., 2005. Functional analysis, overexpression, and kinetic  
686 characterization of pyruvate kinase from *Plasmodium falciparum*. *Biochem.*  
687 *Biophys. Res. Commun.* 326, 188–96. doi:10.1016/j.bbrc.2004.11.018
- 688 Chokkathukalam, A., Jankevics, A., Creek, D.J., Achcar, F., Barrett, M.P., Breitling,  
689 R., 2013. mzMatch-ISO: an R tool for the annotation and relative quantification  
690 of isotope-labelled mass spectrometry data. *Bioinformatics* 29, 281–3.  
691 doi:10.1093/bioinformatics/bts674
- 692 Cobbold, S.A., Santos, J.M., Ochoa, A., Perlman, D.H., Llinás, M., 2016. Proteome-  
693 wide analysis reveals widespread lysine acetylation of major protein complexes  
694 in the malaria parasite. *Sci. Rep.* 6, 19722. doi:10.1038/srep19722
- 695 Cobbold, S.A., Vaughan, A.M., Lewis, I.A., Painter, H.J., Camargo, N., Perlman,  
696 D.H., Fishbaugher, M., Healer, J., Cowman, A.F., Kappe, S.H.I., Llinás, M.,  
697 2013. Kinetic flux profiling elucidates two independent acetyl-CoA biosynthetic  
698 pathways in *Plasmodium falciparum*. *J. Biol. Chem.* 288, 36338–50.  
699 doi:10.1074/jbc.M113.503557
- 700 Crawford, M.J., Thomsen-Zieger, N., Ray, M., Schachtner, J., Roos, D.S., Seeber,  
701 F., 2006. *Toxoplasma gondii* scavenges host-derived lipoic acid despite its de  
702 novo synthesis in the apicoplast. *EMBO J.* doi:10.1038/sj.emboj.7601189
- 703 Deponte, M., Becker, K., 2005. Glutathione S-transferase from malarial parasites:  
704 structural and functional aspects. *Methods Enzymol.* 401, 241–53.  
705 doi:10.1016/S0076-6879(05)01015-3
- 706 Dietz, K.-J., Turkan, I., Krieger-Liszkay, A., 2016. Redox- and Reactive Oxygen  
707 Species-Dependent Signaling into and out of the Photosynthesizing Chloroplast.  
708 *Plant Physiol.* 171, 1541–50. doi:10.1104/pp.16.00375
- 709 Dockrell, H.M., Playfair, J.H., 1984. Killing of *Plasmodium yoelii* by enzyme-induced  
710 products of the oxidative burst. *Infect. Immun.* 43, 451–6.
- 711 Falkard, B., Kumar, T.R.S., Hecht, L.-S., Matthews, K.A., Henrich, P.P., Gulati, S.,  
712 Lewis, R.E., Manary, M.J., Winzeler, E.A., Sinnis, P., Prigge, S.T., Heussler, V.,  
713 Deschermeier, C., Fidock, D.A., 2013. A key role for lipoic acid synthesis during  
714 *Plasmodium* liver stage development. *Cell. Microbiol.* 15, 1585–604.  
715 doi:10.1111/cmi.12137
- 716 Feeney, M.A., Veeravalli, K., Boyd, D., Gon, S., Faulkner, M.J., Georgiou, G.,  
717 Beckwith, J., 2011. Repurposing lipoic acid changes electron flow in two  
718 important metabolic pathways of *Escherichia coli*. *Proc. Natl. Acad. Sci. U. S. A.*  
719 108, 7991–6. doi:10.1073/pnas.1105429108
- 720 Foth, B.J., Stimmler, L.M., Handman, E., Crabb, B.S., Hodder, A.N., McFadden, G.I.,  
721 2005. The malaria parasite *Plasmodium falciparum* has only one pyruvate  
722 dehydrogenase complex, which is located in the apicoplast. *Mol. Microbiol.* 55,

- 723 39–53. doi:10.1111/j.1365-2958.2004.04407.x
- 724 Frohnecke, N., Klein, S., Seeber, F., 2015. Protein-protein interaction studies provide  
725 evidence for electron transfer from ferredoxin to lipoic acid synthase in  
726 *Toxoplasma gondii*. FEBS Lett. 589, 31–6. doi:10.1016/j.febslet.2014.11.020
- 727 Gamo, F.-J., Sanz, L.M., Vidal, J., de Cozar, C., Alvarez, E., Lavandera, J.-L.,  
728 Vanderwall, D.E., Green, D.V.S., Kumar, V., Hasan, S., Brown, J.R., Peishoff,  
729 C.E., Cardon, L.R., Garcia-Bustos, J.F., 2010. Thousands of chemical starting  
730 points for antimalarial lead identification. Nature 465, 305–10.  
731 doi:10.1038/nature09107
- 732 Goodyer, I.D., Taraschi, T.F., 1997. *Plasmodium falciparum*: A Simple, Rapid  
733 Method for Detecting Parasite Clones in Microtiter Plates. Exp. Parasitol. 86,  
734 158–160. doi:10.1006/EXPR.1997.4156
- 735 Gorąca, A., Huk-Kolega, H., Piechota, A., Kleniewska, P., Ciejka, E., Skibska, B.,  
736 2011. Lipoic acid - biological activity and therapeutic potential. Pharmacol. Rep.  
737 63, 849–58. doi:10.1016/S1734-1140(11)70600-4
- 738 Graves, P.M., Carter, R., McNeill, K.M., 1984. Gametocyte production in cloned lines  
739 of *Plasmodium falciparum*. Am. J. Trop. Med. Hyg. 33, 1045–50.  
740 doi:10.4269/ajtmh.1984.33.1045
- 741 Guggisberg, A.M., Frasse, P.M., Jezewski, A.J., Kafai, N.M., Gandhi, A.Y., Erlinger,  
742 S.J., Odom John, A.R., 2018. Suppression of Drug Resistance Reveals a  
743 Genetic Mechanism of Metabolic Plasticity in Malaria Parasites. MBio 9, 1–16.  
744 doi:10.1128/mBio.01193-18
- 745 Günther, S., Storm, J., Müller, S., 2009. *Plasmodium falciparum*: organelle-specific  
746 acquisition of lipoic acid. Int. J. Biochem. Cell Biol. 41, 748–52.  
747 doi:10.1016/j.biocel.2008.10.028
- 748 Günther, S., Wallace, L., Patzewitz, E.-M., McMillan, P.J., Storm, J., Wrenger, C.,  
749 Bissett, R., Smith, T.K., Müller, S., 2007. Apicoplast lipoic acid protein ligase B  
750 is not essential for *Plasmodium falciparum*. PLoS Pathog. 3, e189.  
751 doi:10.1371/journal.ppat.0030189
- 752 Haramaki, N., Han, D., Handelman, G.J., Tritschler, H.J., Packer, L., 1997. Cytosolic  
753 and mitochondrial systems for NADH- and NADPH-dependent reduction of  
754 alpha-lipoic acid. Free Radic. Biol. Med. 22, 535–42. doi:10.1016/S0891-  
755 5849(96)00400-5
- 756 Harris, M.T., Walker, D.M., Drew, M.E., Mitchell, W.G., Dao, K., Schroeder, C.E.,  
757 Flaherty, D.P., Weiner, W.S., Golden, J.E., Morris, J.C., 2013. Interrogating a  
758 hexokinase-selected small-molecule library for inhibitors of *Plasmodium*  
759 *falciparum* hexokinase. Antimicrob. Agents Chemother. 57, 3731–7.  
760 doi:10.1128/AAC.00662-13
- 761 Harwaldt, P., Rahlfs, S., Becker, K., 2002. Glutathione S-transferase of the malarial  
762 parasite *Plasmodium falciparum*: characterization of a potential drug target. Biol.  
763 Chem. 383, 821–30. doi:10.1515/BC.2002.086

- 764 Heneberg, P., 2018. Redox Regulation of Hexokinases, Antioxidants & Redox  
765 Signaling. Mary Ann Liebert, Inc. 140 Huguenot Street, 3rd Floor New  
766 Rochelle, NY 10801 USA . doi:10.1089/ars.2017.7255
- 767 Jankevics, A., Merlo, M.E., de Vries, M., Vonk, R.J., Takano, E., Breitling, R., 2012.  
768 Separating the wheat from the chaff: a prioritisation pipeline for the analysis of  
769 metabolomics datasets. *Metabolomics* 8, 29–36. doi:10.1007/s11306-011-0341-  
770 0
- 771 Kagan, V.E., Shvedova, A., Serbinova, E., Khan, S., Swanson, C., Powell, R.,  
772 Packer, L., 1992. Dihydrolipoic acid-a universal antioxidant both in the  
773 membrane and in the aqueous phase. Reduction of peroxy, ascorbyl and  
774 chromanoxyl radicals. *Biochem. Pharmacol.* doi:10.1016/0006-2952(92)90482-X
- 775 Ke, H., Lewis, I.A., Morrissey, J.M., McLean, K.J., Ganesan, S.M., Painter, H.J.,  
776 Mather, M.W., Jacobs-Lorena, M., Llinás, M., Vaidya, A.B., 2015. Genetic  
777 investigation of tricarboxylic acid metabolism during the *Plasmodium falciparum*  
778 life cycle. *Cell Rep.* 11, 164–74. doi:10.1016/j.celrep.2015.03.011
- 779 Kehr, S., Sturm, N., Rahlfs, S., Przyborski, J.M., Becker, K., 2010.  
780 Compartmentation of redox metabolism in malaria parasites. *PLoS Pathog.* 6,  
781 e1001242. doi:10.1371/journal.ppat.1001242
- 782 Kimata-Arigo, Y., Yuasa, S., Saitoh, T., Fukuyama, H., Hase, T., 2018. *Plasmodium*-  
783 specific basic amino acid residues important for the interaction with ferredoxin  
784 on the surface of ferredoxin-NADP<sup>+</sup> reductase. *J. Biochem.* 164, 231–237.  
785 doi:10.1093/jb/mvy045
- 786 Krnajski, Z., Walter, R.D., Müller, S., 2001. Isolation and functional analysis of two  
787 thioredoxin peroxidases (peroxiredoxins) from *Plasmodium falciparum*. *Mol.*  
788 *Biochem. Parasitol.* 113, 303–308. doi:10.1016/S0166-6851(01)00219-5
- 789 Laine, L.M., 2014. Functional, biochemical and structural analyses of *Plasmodium*  
790 *falciparum* pyruvate dehydrogenase complex. PhD Thesis, University of  
791 Glasgow. University of Glasgow.
- 792 Laine, L.M., Biddau, M., Byron, O., Müller, S., 2015. Biochemical and structural  
793 characterization of the apicoplast dihydrolipoamide dehydrogenase of  
794 *Plasmodium falciparum*. *Biosci. Rep.* 35, 1–15. doi:10.1042/BSR20140150
- 795 Lambros, C., Vanderberg, J.P., 1979. Synchronization of *Plasmodium falciparum*  
796 erythrocytic stages in culture. *J. Parasitol.* 65, 418–20.
- 797 Liebau, E., Bergmann, B., Campbell, A.M., Teesdale-Spittle, P., Brophy, P.M.,  
798 Lüersen, K., Walter, R.D., 2002. The glutathione S-transferase from  
799 *Plasmodium falciparum*. *Mol. Biochem. Parasitol.* 124, 85–90.  
800 doi:10.1016/S0166-6851(02)00160-3
- 801 Lim, L., McFadden, G.I., 2010. The evolution, metabolism and functions of the  
802 apicoplast. *Philos. Trans. R. Soc. Lond. B. Biol. Sci.* 365, 749–63.  
803 doi:10.1098/rstb.2009.0273
- 804 Lindner, S.E., Mikolajczak, S.A., Vaughan, A.M., Moon, W., Joyce, B.R., Sullivan,

- 805 W.J., Kappe, S.H.I., 2013. Perturbations of *Plasmodium* Puf2 expression and  
806 RNA-seq of Puf2-deficient sporozoites reveal a critical role in maintaining RNA  
807 homeostasis and parasite transmissibility. *Cell. Microbiol.* 15, 1266–83.  
808 doi:10.1111/cmi.12116
- 809 Livak, K.J., Schmittgen, T.D., 2001. Analysis of relative gene expression data using  
810 real-time quantitative PCR and the 2<sup>-</sup>(Delta Delta C(T)) Method. *Methods* 25,  
811 402–8. doi:10.1006/meth.2001.1262
- 812 MacRae, J.I., Dixon, M.W., Dearnley, M.K., Chua, H.H., Chambers, J.M., Kenny, S.,  
813 Bottova, I., Tilley, L., McConville, M.J., 2013. Mitochondrial metabolism of  
814 sexual and asexual blood stages of the malaria parasite *Plasmodium*  
815 *falciparum*. *BMC Biol.* 11, 67. doi:10.1186/1741-7007-11-67
- 816 Maier, A.G., Braks, J.A.M., Waters, A.P., Cowman, A.F., 2006. Negative selection  
817 using yeast cytosine deaminase/uracil phosphoribosyl transferase in  
818 *Plasmodium falciparum* for targeted gene deletion by double crossover  
819 recombination. *Mol. Biochem. Parasitol.* 150, 118–21.  
820 doi:10.1016/j.molbiopara.2006.06.014
- 821 McMillan, P.J., Stimmler, L.M., Foth, B.J., McFadden, G.I., Müller, S., 2005. The  
822 human malaria parasite *Plasmodium falciparum* possesses two distinct  
823 dihydrolipoamide dehydrogenases. *Mol. Microbiol.* 55, 27–38.  
824 doi:10.1111/j.1365-2958.2004.04398.x
- 825 Millard, P., Delépine, B., Guionnet, M., Heuillet, M., Bellvert, F., Létisse, F., Wren, J.,  
826 2019. IsoCor: Isotope correction for high-resolution MS labeling experiments.  
827 *Bioinformatics* 35, 4484–4487. doi:10.1093/bioinformatics/btz209
- 828 Mohring, F., Pretzel, J., Jortzik, E., Becker, K., 2014. The redox systems of  
829 *Plasmodium falciparum* and *Plasmodium vivax*: comparison, in silico analyses  
830 and inhibitor studies. *Curr. Med. Chem.* 21, 1728–56.
- 831 Mohring, F., Rahbari, M., Zechmann, B., Rahlfs, S., Przyborski, J.M., Meyer, A.J.,  
832 Becker, K., 2017. Determination of glutathione redox potential and pH value in  
833 subcellular compartments of malaria parasites. *Free Radic. Biol. Med.* 104, 104–  
834 117. doi:10.1016/j.freeradbiomed.2017.01.001
- 835 Mony, B.M., Mehta, M., Jarori, G.K., Sharma, S., 2009. Plant-like  
836 phosphofructokinase from *Plasmodium falciparum* belongs to a novel class of  
837 ATP-dependent enzymes. *Int. J. Parasitol.* 39, 1441–53.  
838 doi:10.1016/j.ijpara.2009.05.011
- 839 Mooney, B.P., Miernyk, J.A., Randall, D.D., 2002. The complex fate of alpha-  
840 ketoacids. *Annu. Rev. Plant Biol.* 53, 357–75.  
841 doi:10.1146/annurev.arplant.53.100301.135251
- 842 Moura, F.A., de Andrade, K.Q., dos Santos, J.C.F., Goulart, M.O.F., 2015. Lipoic  
843 Acid: its antioxidant and anti-inflammatory role and clinical applications. *Curr.*  
844 *Top. Med. Chem.* 15, 458–83. doi:10.2174/1568026615666150114161358
- 845 Müller, S., 2015. Role and Regulation of Glutathione Metabolism in *Plasmodium*  
846 *falciparum*. *Molecules* 20, 10511–34. doi:10.3390/molecules200610511

- 847 Nepveu, F., Turrini, F., 2013. Targeting the redox metabolism of *Plasmodium*  
848 *falciparum*. *Future Med. Chem.* doi:10.4155/fmc.13.159
- 849 Nietzel, T., Mostertz, J., Hochgräfe, F., Schwarzländer, M., 2017. Redox regulation  
850 of mitochondrial proteins and proteomes by cysteine thiol switches.  
851 *Mitochondrion* 33, 72–83. doi:10.1016/j.mito.2016.07.010
- 852 O'Neill, M.T., Phuong, T., Healer, J., Richard, D., Cowman, A.F., O'Neill, M.T.,  
853 Phuong, T., Healer, J., Richard, D., Cowman, A.F., 2011. Gene deletion from  
854 *Plasmodium falciparum* using FLP and Cre recombinases: Implications for  
855 applied site-specific recombination. *Int. J. Parasitol.* 41, 117–123.
- 856 Oppenheim, R.D., Creek, D.J., Macrae, J.I., Modrzynska, K.K., Pino, P., Limenitakis,  
857 J., Polonais, V., Seeber, F., Barrett, M.P., Billker, O., McConville, M.J., Soldati-  
858 Favre, D., 2014. BCKDH: The Missing Link in Apicomplexan Mitochondrial  
859 Metabolism Is Required for Full Virulence of *Toxoplasma gondii* and  
860 *Plasmodium berghei*. *PLoS Pathog.* doi:10.1371/journal.ppat.1004263
- 861 Packer, L., Witt, E.H., Tritschler, H.J., 1995. alpha-Lipoic acid as a biological  
862 antioxidant. *Free Radic. Biol. Med.* 19, 227–50. doi:10.1016/0891-  
863 5849(95)00017-R
- 864 Pastrana-Mena, R., Dinglasan, R.R., Franke-Fayard, B., Vega-Rodríguez, J.,  
865 Fuentes-Caraballo, M., Baerga-Ortiz, A., Coppens, I., Jacobs-Lorena, M.,  
866 Janse, C.J., Serrano, A.E., 2010. Glutathione reductase-null malaria parasites  
867 have normal blood stage growth but arrest during development in the mosquito.  
868 *J. Biol. Chem.* 285, 27045–27056. doi:10.1074/jbc.M110.122275
- 869 Patzewitz, E.-M., Salcedo-Sora, J.E., Wong, E.H., Sethia, S., Stocks, P.A.,  
870 Maughan, S.C., Murray, J.A.H., Krishna, S., Bray, P.G., Ward, S.A., Müller, S.,  
871 2013. Glutathione Transport: A New Role for PfCRT in Chloroquine Resistance.  
872 *Antioxid. Redox Signal.* doi:10.1089/ars.2012.4625
- 873 Perham, R.N., 2000. Swinging arms and swinging domains in multifunctional  
874 enzymes: catalytic machines for multistep reactions. *Annu. Rev. Biochem.* 69,  
875 961–1004. doi:10.1146/annurev.biochem.69.1.961
- 876 Pick, U., Haramaki, N., Constantinescu, A., Handelman, G.J., Tritschler, H.J.,  
877 Packer, L., 1995. Glutathione reductase and lipoamide dehydrogenase have  
878 opposite stereospecificities for alpha-lipoic acid enantiomers. *Biochem. Biophys.*  
879 *Res. Commun.* 206, 724–30. doi:10.1006/bbrc.1995.1102
- 880 Ponnudurai, T., Lensen, A.H.W., Meis, J.F.G.M., Meuwissen, J.H.E., 1986.  
881 Synchronization of *Plasmodium falciparum* gametocytes using an automated  
882 suspension culture system. *Parasitology* 93 ( Pt 2), 263–74.  
883 doi:10.1017/S003118200005143X
- 884 Rahbari, M., Rahlfs, S., Przyborski, J.M., Schuh, A.K., Hunt, N.H., Fidock, D.A.,  
885 Grau, G.E., Becker, K., 2017. Hydrogen peroxide dynamics in subcellular  
886 compartments of malaria parasites using genetically encoded redox probes. *Sci.*  
887 *Rep.* doi:10.1038/s41598-017-10093-8
- 888 Rungsiwongse, J., Rosenberg, R., 1991. The Number of Sporozoites Produced by



- 889 Individual Malaria Oocysts. *Am. J. Trop. Med. Hyg.* 45, 574–577.  
890 doi:10.4269/ajtmh.1991.45.574
- 891 Salcedo-Sora, J.E., Caamano-Gutierrez, E., Ward, S.A., Biagini, G.A., 2014. The  
892 proliferating cell hypothesis: A metabolic framework for Plasmodium growth and  
893 development. *Trends Parasitol.* doi:10.1016/j.pt.2014.02.001
- 894 Scheltema, R.A., Jankevics, A., Jansen, R.C., Swertz, M.A., Breitling, R., 2011.  
895 PeakML/mzMatch: a file format, Java library, R library, and tool-chain for mass  
896 spectrometry data analysis. *Anal. Chem.* 83, 2786–93. doi:10.1021/ac2000994
- 897 Schmidtman, E., König, A.-C., Orwat, A., Leister, D., Hartl, M., Finkemeier, I., 2014.  
898 Redox regulation of *Arabidopsis* mitochondrial citrate synthase. *Mol. Plant* 7,  
899 156–69. doi:10.1093/mp/sst144
- 900 Seeber, F., Aliverti, A., Zanetti, G., 2005. The Plant-Type Ferredoxin-NADP+  
901 Reductase/Ferredoxin Redox System as a Possible Drug Target Against  
902 Apicomplexan Human Parasites. *Curr. Pharm. Des.* 11, 3159–3172.  
903 doi:10.2174/1381612054864957
- 904 Seeber, F., Soldati-Favre, D., 2010. Metabolic pathways in the apicoplast of  
905 apicomplexa. *Int. Rev. Cell Mol. Biol.* 281, 161–228. doi:10.1016/S1937-  
906 6448(10)81005-6
- 907 Sewelam, N., Jaspert, N., Van Der Kelen, K., Tognetti, V.B., Schmitz, J.,  
908 Frerigmann, H., Stahl, E., Zeier, J., Van Breusegem, F., Maurino, V.G., 2014.  
909 Spatial H<sub>2</sub>O<sub>2</sub> signaling specificity: H<sub>2</sub>O<sub>2</sub> from chloroplasts and peroxisomes  
910 modulates the plant transcriptome differentially. *Mol. Plant* 7, 1191–210.  
911 doi:10.1093/mp/ssu070
- 912 Sheiner, L., Demerly, J.L., Poulsen, N., Beatty, W.L., Lucas, O., Behnke, M.S.,  
913 White, M.W., Striepen, B., 2011. A systematic screen to discover and analyze  
914 apicoplast proteins identifies a conserved and essential protein import factor.  
915 *PLoS Pathog.* 7, e1002392. doi:10.1371/journal.ppat.1002392
- 916 Sheiner, L., Vaidya, A.B., McFadden, G.I., 2013. The metabolic roles of the  
917 endosymbiotic organelles of *Toxoplasma* and *Plasmodium* spp. *Curr. Opin.*  
918 *Microbiol.* 16, 452–8. doi:10.1016/j.mib.2013.07.003
- 919 Shimizu, S., Osada, Y., Kanazawa, T., Tanaka, Y., Arai, M., 2010. Suppressive  
920 effect of azithromycin on Plasmodium berghei mosquito stage development and  
921 apicoplast replication. doi:10.1186/1475-2875-9-73
- 922 Shivapurkar, R., Hingamire, T., Kulkarni, A.S., Rajamohanam, P.R., Reddy, D.S.,  
923 Shanmugam, D., 2018. Evaluating antimalarial efficacy by tracking glycolysis in  
924 Plasmodium falciparum using NMR spectroscopy. *Sci. Rep.* 8, 1–10.  
925 doi:10.1038/s41598-018-36197-3
- 926 Siciliano, G., Santha Kumar, T.R., Bona, R., Camarda, G., Calabretta, M.M.,  
927 Cevenini, L., Davioud-Charvet, E., Becker, K., Cara, A., Fidock, D.A., Alano, P.,  
928 2017. A high susceptibility to redox imbalance of the transmissible stages of  
929 Plasmodium falciparum revealed with a luciferase-based mature gametocyte  
930 assay. *Mol. Microbiol.* 104, 306–318. doi:10.1111/mmi.13626

- 931 Storm, J., Sethia, S., Blackburn, G.J., Chokkathukalam, A., Watson, D.G., Breitling,  
932 R., Coombs, G.H., Müller, S., 2014. Phosphoenolpyruvate carboxylase identified  
933 as a key enzyme in erythrocytic *Plasmodium falciparum* carbon metabolism.  
934 PLoS Pathog. 10, e1003876. doi:10.1371/journal.ppat.1003876
- 935 Sumner, L.W., Amberg, A., Barrett, D., Beale, M.H., Beger, R., Daykin, C.A., Fan,  
936 T.W.M., Fiehn, O., Goodacre, R., Griffin, J.L., Hankemeier, T., Hardy, N.,  
937 Harnly, J., Higashi, R., Kopka, J., Lane, A.N., Lindon, J.C., Marriott, P., Nicholls,  
938 A.W., Reily, M.D., Thaden, J.J., Viant, M.R., 2007. Proposed minimum reporting  
939 standards for chemical analysis: Chemical Analysis Working Group (CAWG)  
940 Metabolomics Standards Initiative (MSI). Metabolomics. doi:10.1007/s11306-  
941 007-0082-2
- 942 Tautenhahn, R., Bottcher, C., Neumann, S., 2008. Highly sensitive feature detection  
943 for high resolution LC/MS. BMC Bioinformatics. doi:10.1186/1471-2105-9-504
- 944 Tibullo, D., Li Volti, G., Giallongo, C., Grasso, S., Tomassoni, D., Anfuso, C.D., Lupo,  
945 G., Amenta, F., Avola, R., Bramanti, V., 2017. Biochemical and clinical  
946 relevance of alpha lipoic acid: antioxidant and anti-inflammatory activity,  
947 molecular pathways and therapeutic potential. Inflamm. Res. 66, 947–959.  
948 doi:10.1007/s00011-017-1079-6
- 949 Trager, W., Jensen, J.B., 1976. Human malaria parasites in continuous culture.  
950 Science 193, 673–5. doi:10.1038/098448b0
- 951 Urscher, M., Przyborski, J.M., Imoto, M., Deponte, M., 2010. Distinct subcellular  
952 localization in the cytosol and apicoplast, unexpected dimerization and inhibition  
953 of *Plasmodium falciparum* glyoxalases. Mol. Microbiol. 76, 92–103.  
954 doi:10.1111/j.1365-2958.2010.07082.x
- 955 van Schaijk, B.C.L., Kumar, T.R.S., Vos, M.W., Richman, A., van Gemert, G.-J., Li,  
956 T., Eappen, A.G., Williamson, K.C., Morahan, B.J., Fishbaugher, M., Kennedy,  
957 M., Camargo, N., Khan, S.M., Janse, C.J., Sim, K.L., Hoffman, S.L., Kappe,  
958 S.H.I., Sauerwein, R.W., Fidock, D.A., Vaughan, A.M., 2014. Type II fatty acid  
959 biosynthesis is essential for *Plasmodium falciparum* sporozoite development in  
960 the midgut of *Anopheles* mosquitoes. Eukaryot. Cell 13, 550–9.  
961 doi:10.1128/EC.00264-13
- 962 Vaughan, A.M., O'Neill, M.T., Tarun, A.S., Camargo, N., Phuong, T.M., Aly, A.S.I.,  
963 Cowman, A.F., Kappe, S.H.I., 2009. Type II fatty acid synthesis is essential only  
964 for malaria parasite late liver stage development. Cell. Microbiol. 11, 506–20.  
965 doi:10.1111/j.1462-5822.2008.01270.x
- 966 Vincent, I.M., Barrett, M.P., 2015. Metabolomic-based strategies for anti-parasite  
967 drug discovery. J. Biomol. Screen. doi:10.1177/1087057114551519
- 968 Wezena, C.A., Alisch, R., Golzmann, A., Liedgens, L., Staudacher, V., Pradel, G.,  
969 Deponte, M., 2017. The cytosolic glyoxalases of *Plasmodium falciparum* are  
970 dispensable during asexual blood-stage development. Microb. cell (Graz,  
971 Austria) 5, 32–41. doi:10.15698/mic2018.01.608
- 972 World Health Organization, 2019. World Malaria Report 2019. Geneva.

- 973 Wrenger, C., Müller, S., 2003. Isocitrate dehydrogenase of *Plasmodium falciparum*:  
974 Energy metabolism or redox control? Eur. J. Biochem. doi:10.1046/j.1432-  
975 1033.2003.03536.x
- 976 Yoshida, K., Hisabori, T., 2014. Mitochondrial isocitrate dehydrogenase is inactivated  
977 upon oxidation and reactivated by thioredoxin-dependent reduction in  
978 Arabidopsis. Front. Environ. Sci. 2, 1–7. doi:10.3389/fenvs.2014.00038
- 979 Yoshida, K., Noguchi, K., Motohashi, K., Hisabori, T., 2013. Systematic exploration  
980 of thioredoxin target proteins in plant mitochondria. Plant Cell Physiol.  
981 doi:10.1093/pcp/pct037
- 982 Zhang, M., Wang, C., Otto, T.D., Oberstaller, J., Liao, X., Adapa, S.R., Udenze, K.,  
983 Bronner, I.F., Casandra, D., Mayho, M., Brown, J., Li, S., Swanson, J., Rayner,  
984 J.C., Jiang, R.H.Y., Adams, J.H., 2018. Uncovering the essential genes of the  
985 human malaria parasite *Plasmodium falciparum* by saturation mutagenesis.  
986 Science 360, eaap7847. doi:10.1126/science.aap7847
- 987 Zocher, K., Fritz-Wolf, K., Kehr, S., Fischer, M., Rahlfs, S., Becker, K., 2012.  
988 Biochemical and structural characterization of *Plasmodium falciparum* glutamate  
989 dehydrogenase 2. Mol. Biochem. Parasitol. 183, 52–62.  
990 doi:10.1016/j.molbiopara.2012.01.007
- 991 Zuzarte-Luís, V., Mello-Vieira, J., Marreiros, I.M., Liehl, P., Chora, Â.F., Carret, C.K.,  
992 Carvalho, T., Mota, M.M., 2017. Dietary alterations modulate susceptibility to  
993 *Plasmodium* infection. Nat. Microbiol. 2, 1600–1607. doi:10.1038/s41564-017-  
994 0025-2
- 995
- 996

997 **Supplemental figures**

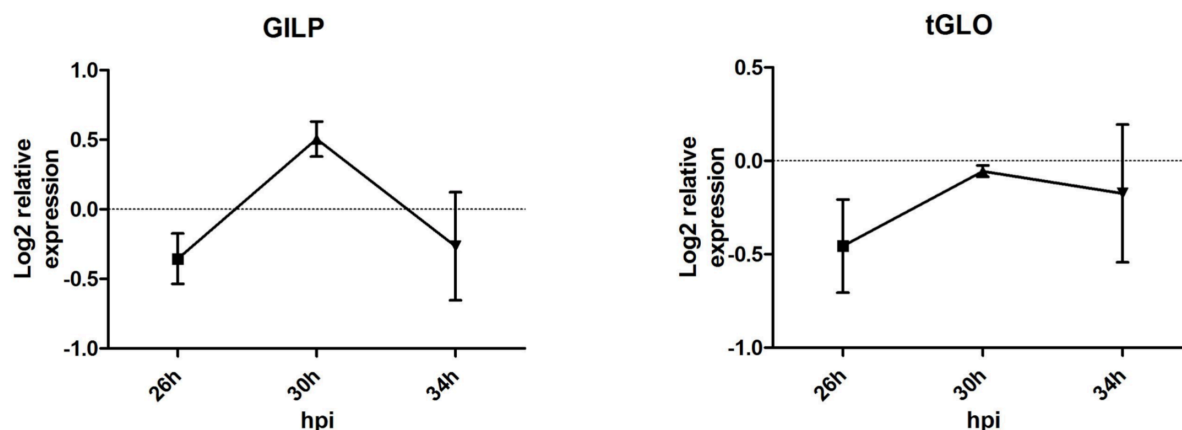

998

999 **Figure S1. Analysis of the apicoplast glyoxalase system enzymes relative expression**  
1000 **levels.** Relative expression levels for the enzymes glyoxalase-1-like protein (GILP) and  
1001 glyoxalase 2 (tGLO) were determined in three independent experiments from highly  
1002 synchronised parasites following the sorbitol and MACS protocol (see Materials and Methods).  
1003 Samples were harvested at 26, 30 and 34 hpi. Differences are expressed as  $\text{Log}_2$  of the  
1004  $3D7^{\Delta PflipB}/3D7^{WT}$  ratio of the mean signals from three experiments  $\pm$  SD.

1005

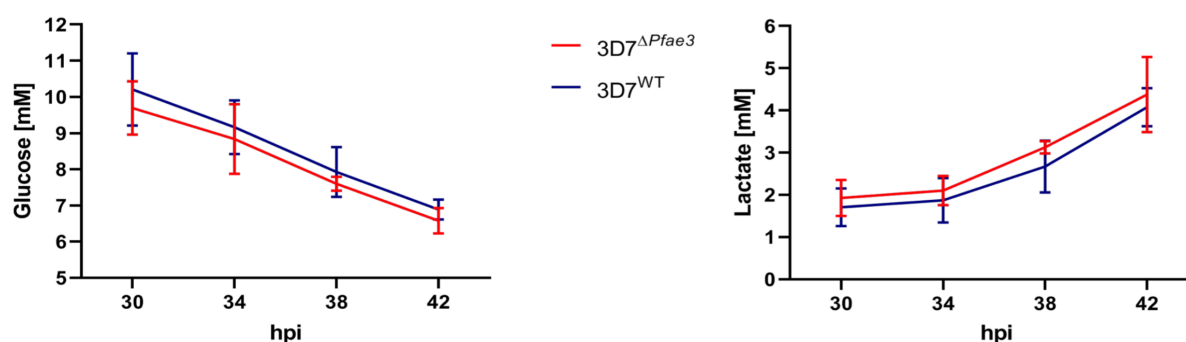

1006

1007 **Figure S2. Analysis of D-glucose (left) and L-lactate (right) in spent medium samples**  
1008 **from  $3D7^{\Delta Pfae3}$  mutants and  $3D7^{WT}$  parasites cultures.** Spent medium samples were  
1009 analysed using a commercial enzymatic assay for D-glucose and L-lactate. Three  
1010 independent experiments in triplicate cultures at 4% parasitemia were used for each parasite  
1011 line tested in this experiment. Results are reported as mean  $\pm$  SD (n=3). The variance between  
1012 the lines at each time point was analysed with the Student t-test using GraphPad Prism 5.  
1013

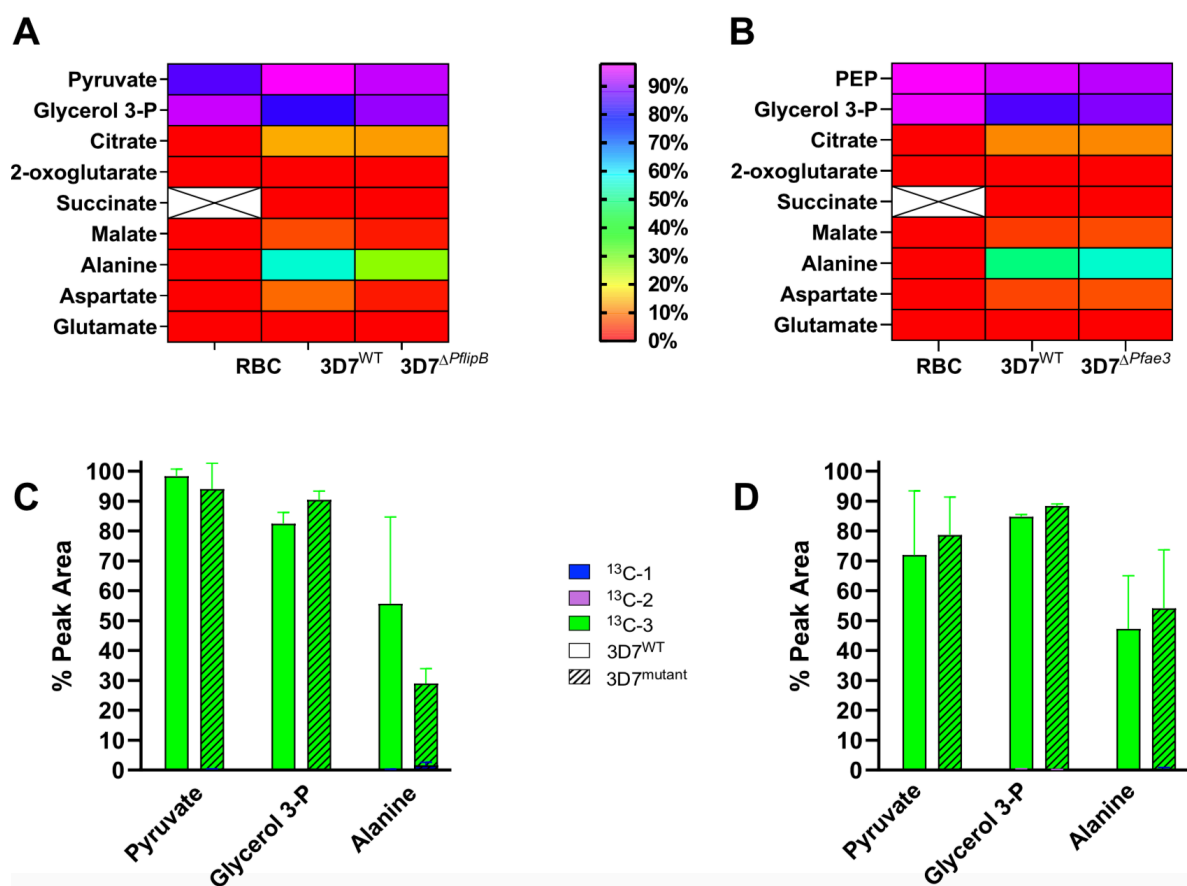

1014

1015 **Figure S3. Metabolomic analyses of 3D7<sup>ΔPflipB</sup> (A,C) 3D7<sup>ΔPfae3</sup> (B,D) mutants and 3D7<sup>WT</sup>**  
 1016 **parasites using <sup>13</sup>C-U-D-glucose labelling.** Results from two independent targeted  
 1017 metabolomics experiments in biological triplicates comparing 3D7<sup>ΔPfae3</sup> or 3D7<sup>ΔPflipB</sup> mutant to  
 1018 3D7<sup>WT</sup> line after incubation in culture medium containing 100% <sup>13</sup>C-U-D-glucose for 28 hours.  
 1019 (A-B) Heatmap representing the total labelling incorporation from <sup>13</sup>C-U-D-glucose in RBC,  
 1020 3D7<sup>WT</sup> and 3D7<sup>ΔPflipB</sup> (A) or 3D7<sup>ΔPfae3</sup> (B) mutants. Crossed squares shows that succinate could  
 1021 not be detected in that analysis. (C-D) Bar graphs summarising the percentage of isotopic  
 1022 incorporation in each identified metabolite relative to the peak area presented as mean ± SD  
 1023 (n=2). Empty bars represent metabolites identified in 3D7<sup>WT</sup> parasites, while dashed bars  
 1024 correspond to metabolites from 3D7<sup>ΔPflipB</sup> (C) or 3D7<sup>ΔPfae3</sup> (D) mutants.

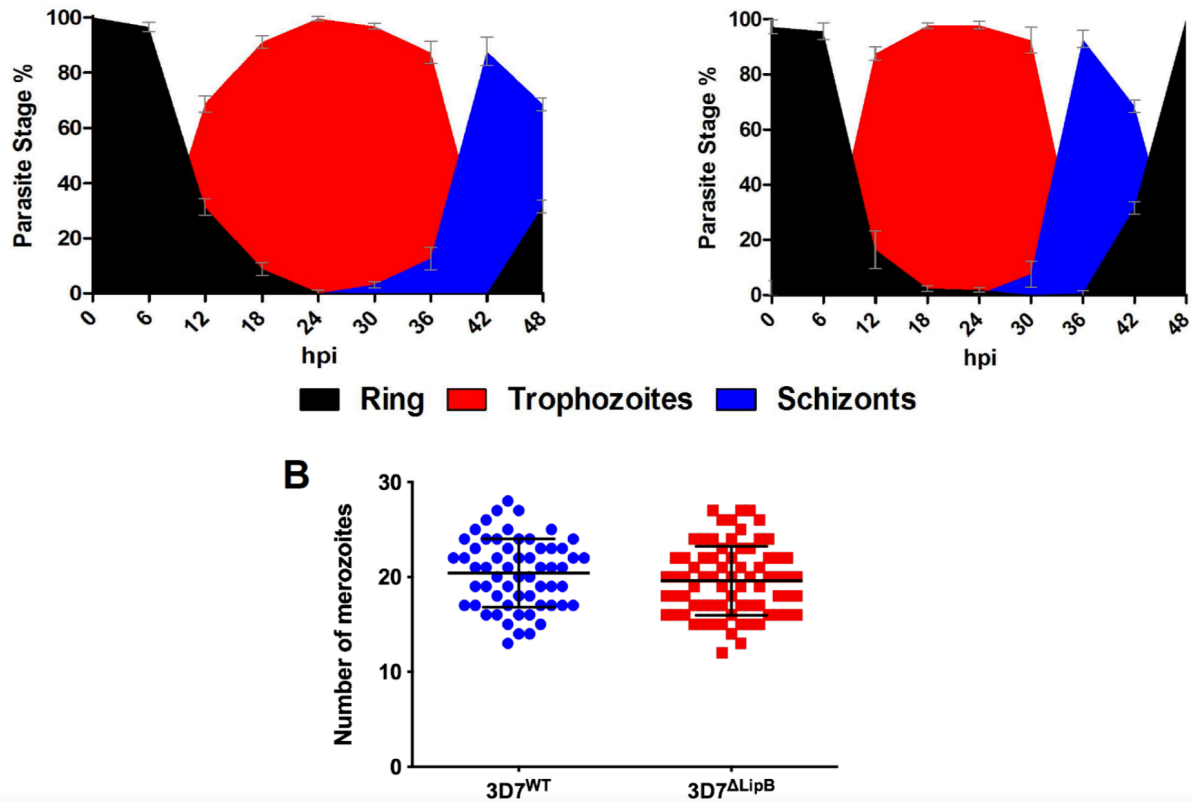

1025

1026 **Figure S4. Growth pattern of 3D7<sup>ΔPflipB</sup> mutants and 3D7<sup>WT</sup> parasites.** (A) The variation for  
1027 each parasite stage during asexual development was estimated by counting 200 random  
1028 infected RBCs for each time point for 3D7<sup>WT</sup> (left) and 3D7<sup>ΔPflipB</sup> mutants (right). Fractions are  
1029 presented as the mean percentage from three cultures for each condition, error bars  
1030 correspond to SD. (B) The graph represents the number of merozoite per segmenter (n=100)  
1031 in 3D7<sup>ΔPflipB</sup> mutants and 3D7<sup>WT</sup>. Bars represent mean ± SD.

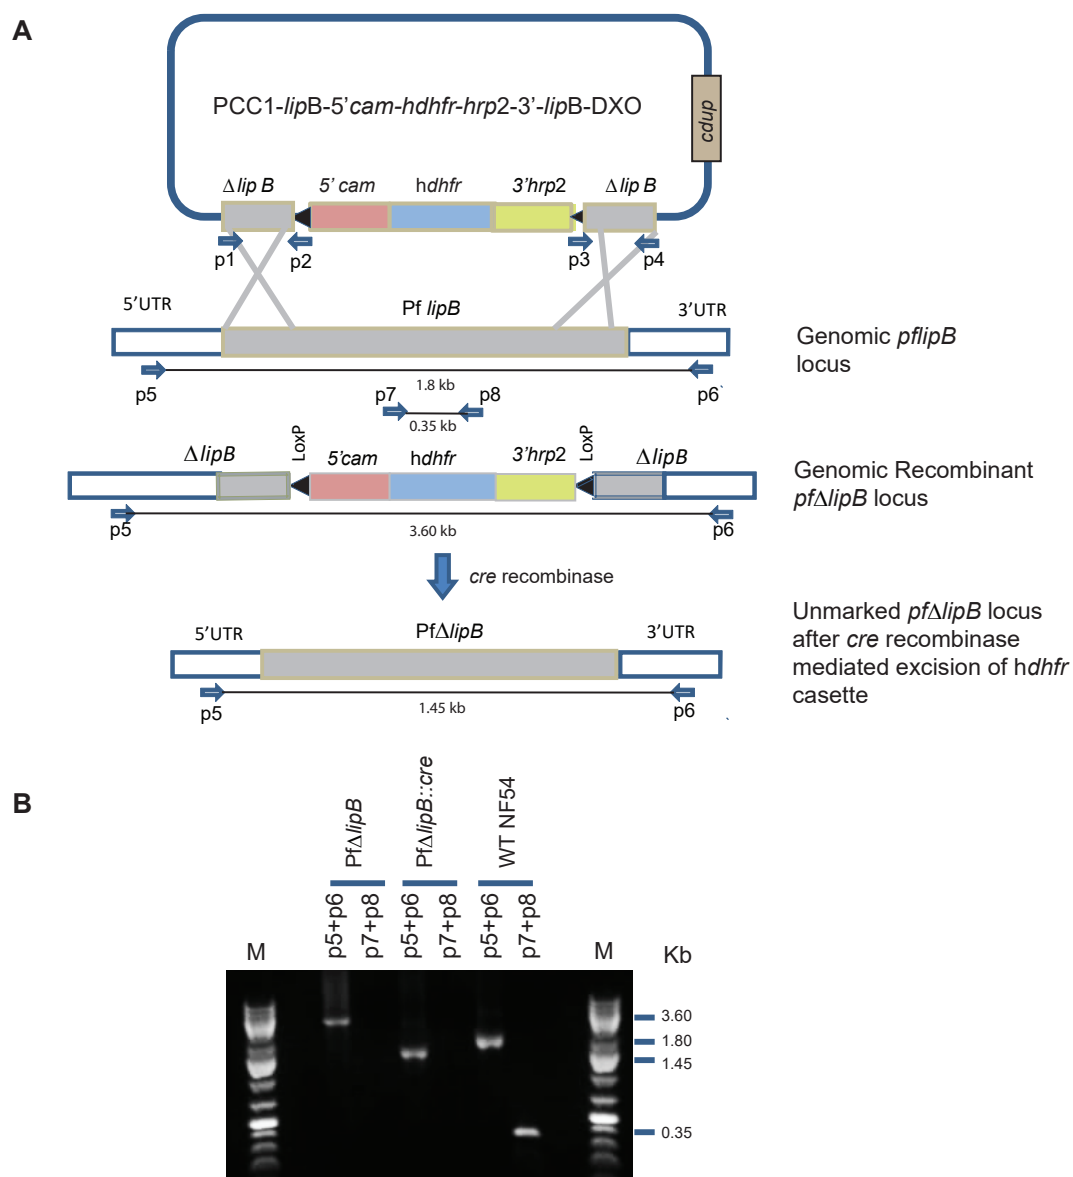

1032

1033 **Figure S5. Generation and genotypic analysis of *PfΔlipB* in *P. falciparum* NF54.** (A) To  
 1034 generate parasite lines lacking a functional *pflipB* locus (PF3D7\_0823600) we employed a  
 1035 double crossover recombination strategy using *Cre-loxP*. 0.5 kb fragments on both ends of  
 1036 *pflipB* served as homology regions for double cross-over recombination and the *LoxP* site was  
 1037 incorporated into the genomic locus that flanks the *hdhfr* cassette. Primers used to amplify the  
 1038 double-recombination plasmid and to test for integration are shown. (B) PCR results showing  
 1039 *pflipB* deletion in the knockout strain. Lane 1: Marker (M) NEB 1kb plus DNA ladder, 3-4:  
 1040 *PfΔlipB*; Lanes 5-6: *PfΔlipB::Cre*, Lanes 7-8: wild-type NF54. Primers p5/p6 amplified a 3.6 kb  
 1041 fragment only from *PfΔlipB* strain due to the incorporation of the *hdhfr* cassette. A much  
 1042 smaller 1.45 kb fragment in *PfΔlipB::Cre* strain due to unmarking action of *Cre* recombinase.  
 1043 In both these strains primers p7/p8 did not give a product. Alternatively, primers p5/p6  
 1044 amplified a 1.8 kb fragment in the wild-type NF54 strain. Primers p7/p8 amplified a product of  
 1045 0.35 kb as the deleted fragment was retained in the non-recombinant WT NF54 strain.  
 1046

1047 **Table S1** - List of primers used in this work including names, sequences and purpose.  
 1048 Restriction enzyme sites are italicized. LoxP site are indicated in lower case letters. The  
 1049 underlined bases constitute STOP codon.

| Primer Number | Primer Name           | Sequence                                                                                      | Restriction site | Purpose                                                                |
|---------------|-----------------------|-----------------------------------------------------------------------------------------------|------------------|------------------------------------------------------------------------|
| p1            | LipB-F1               | ACACCGCGGT <u>TAA</u> ATAAAATGTAAACGTACACTTAAC                                                | <i>SacII</i>     | Amplification of <i>PflipB</i> gene flanking regions with loxP inserts |
| p2            | LipB-LoxP-R1          | ATGCTTAAGataactcgtatagcatacattatacgaagtatt <u>TAA</u> ATATC<br>ACTACAATTTGCTACACTAC           | <i>AflIII</i>    |                                                                        |
| p3            | LipB-LoxP-F2          | ACACTAGAA <u>TT</u> Cataactcgtataatgtatgctatacgaagttat <u>TAA</u> CG<br>CACTTTTGATTTGCGCACAAC | <i>EcoRI</i>     |                                                                        |
| p4            | LipB-R2               | ACAACACCTAGGT <u>TA</u> GAAAAAGATAAGTATCCCTTAGATG                                             | <i>AvrII</i>     |                                                                        |
| p5            | LipB-5'UTR-F          | GTAGCATATAGATTTACACAACACTAAC                                                                  | /                | Amplification of <i>PflipB</i> gene locus                              |
| p6            | LipB-3'UTR-R          | CTGTACCCGTTATGGTGACATAAA                                                                      | /                |                                                                        |
| p7            | del-LipB-F            | TAATTTGTATTCGAATGAAATTATTC                                                                    | /                | Control primers for <i>PflipB</i> excision                             |
| p8            | del-LipB-R            | CTTACTGTTTGAATTTGTATATATG                                                                     | /                |                                                                        |
| p9            | GILPF                 | TTGGGGCTTGGAGTACACTT                                                                          | /                | Amplification of <i>PfGILP</i> by qPCR                                 |
| p10           | GILPR                 | AAATCTCCGTACCTGAGCCT                                                                          | /                |                                                                        |
| p11           | tGLOF                 | TGTGGTCATGAATATACACTCGA                                                                       | /                | Amplification of <i>PfGLO</i> by qPCR                                  |
| p12           | tGLOR                 | TCGTTCTGATCACATCTTAGGAA                                                                       | /                |                                                                        |
| p13           | AOPF                  | TTTACGCCTACTTGCAAGTACA                                                                        | /                | Amplification of <i>PfAOP</i> by qPCR                                  |
| p14           | AOPR                  | TCTCCAAGGTCTCATTCCCA                                                                          | /                |                                                                        |
| p15           | TP <sub>X(GI)</sub> F | GCAAGAGGATTGGAGGTATACA                                                                        | /                | Amplification of <i>PfTP<sub>X(GI)</sub></i> by qPCR                   |
| p16           | TP <sub>X(GI)</sub> R | TGTGGGGAAAGCTAAGATCTAAA                                                                       | /                |                                                                        |
| p17           | ATrx2F                | TCATAATCTAAGAACTGGGCGA                                                                        | /                | Amplification of <i>PfATrx2</i> by qPCR                                |
| p18           | ATrx2R                | TCGTTTGGTGGTTCGTTTGG                                                                          | /                |                                                                        |
| p19           | PfACTF                | GAAGCAGCAGGAATCCACAC                                                                          | /                | Amplification of <i>PfActin</i> by qPCR                                |
| p20           | PfACTR1               | GTTGATGGTGCAAGGGTTGT                                                                          | /                |                                                                        |

1050
